# Supplementary material for: Integrated multi-omics analysis of Huntington disease identifies pathways that modulate protein aggregation
Source: PubMed Central journal article supplement (PMC10655815; doi:10.1242/dmm.049492), 2022-10-31
Supplement: dmm-15-049492-s1.pdf [file dmm-15-049492-s1.pdf]

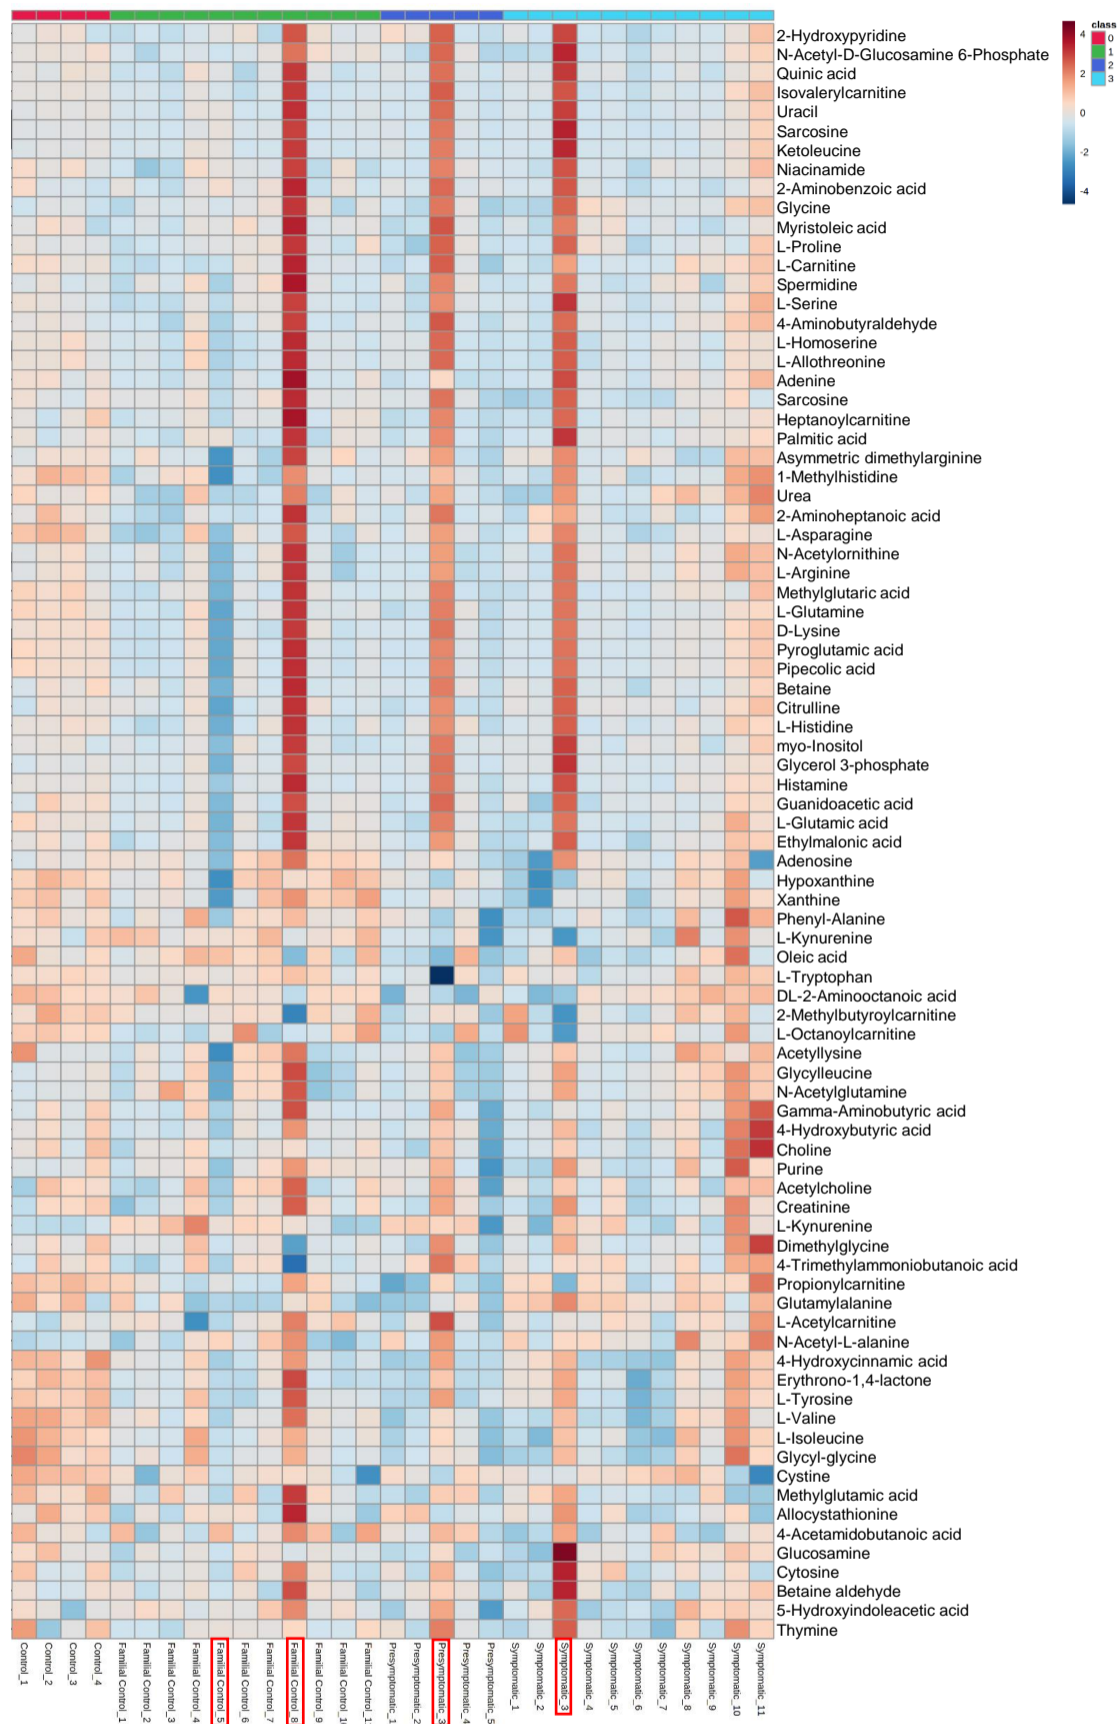

**Fig. S1. Metabolomics- Heatmap**

Heatmap showing metabolites detected in HD serum samples. The samples have been categorised into groups of control, familial control, presymptomatic and symptomatic. The outliers have been highlighted with red. Figures generated using MetaboAnalyst 5.0- <https://www.metaboanalyst.ca/>.

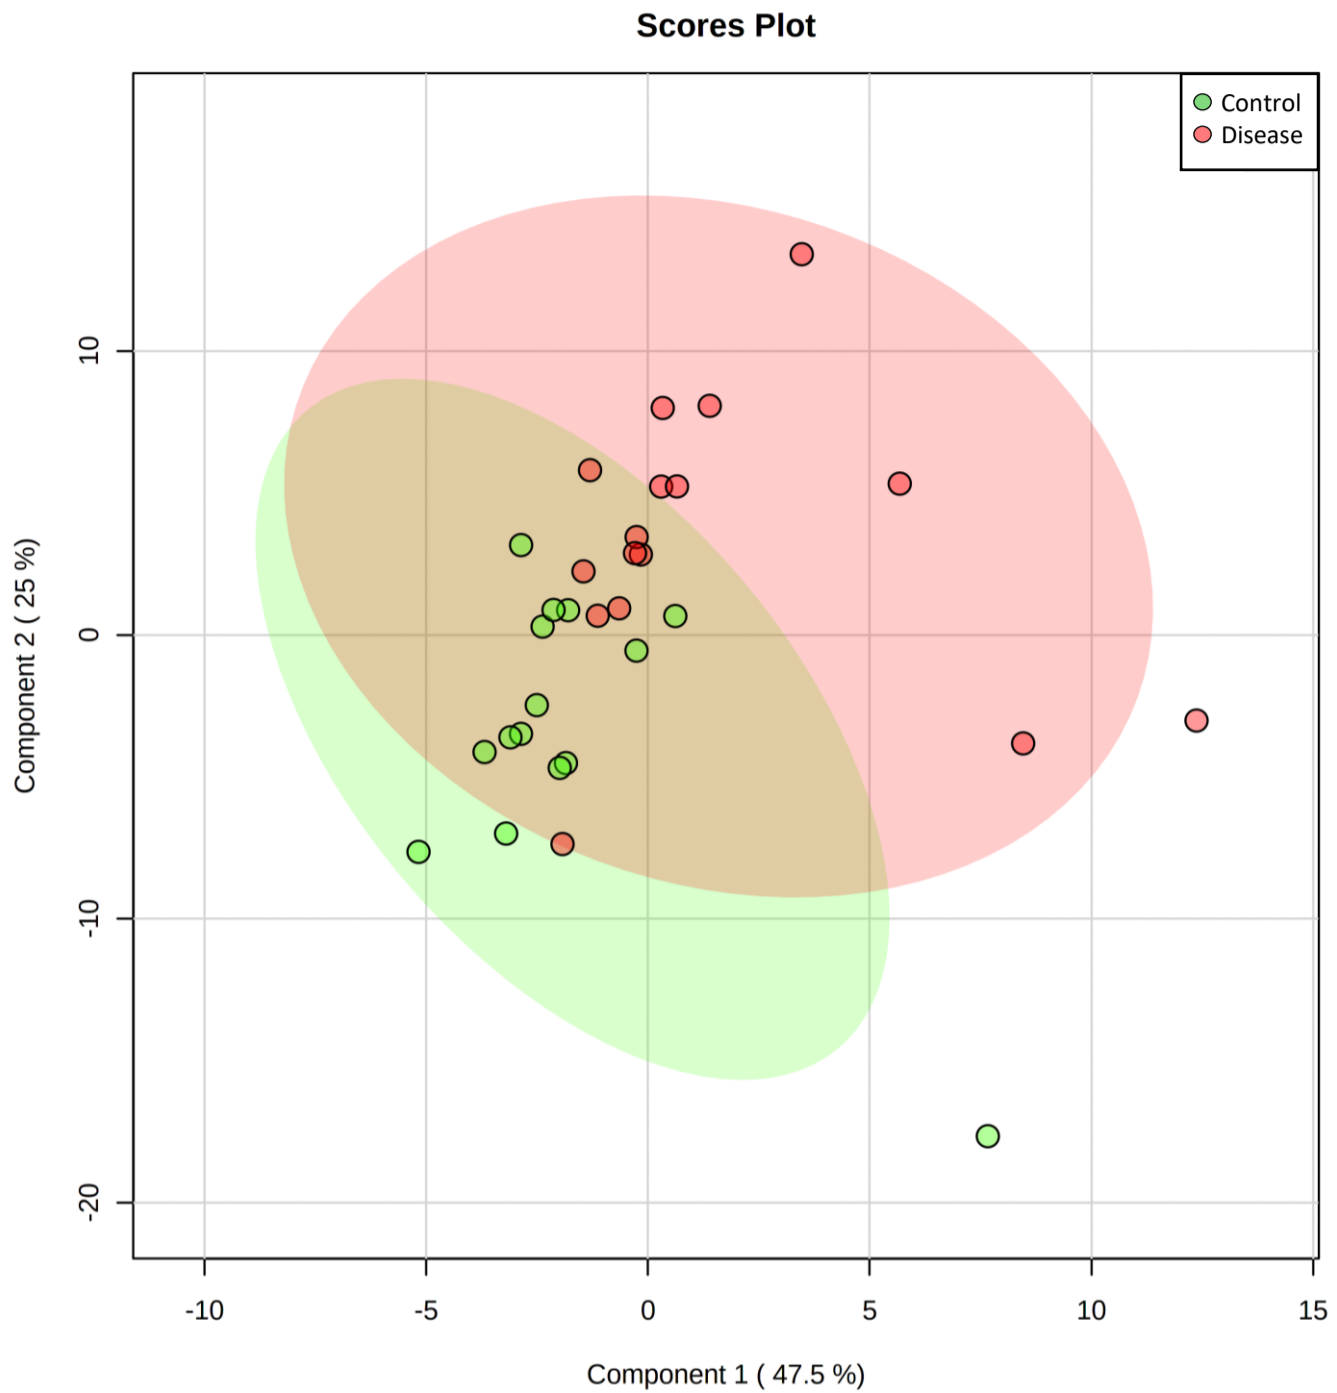

**Fig. S2. Partial Least Squares Discriminant Analysis (PLS-DA)**

PLSDA clustering show 2D score plot for metabolomic sample of HD serum of patient samples vs control with outliers. Figures generated using MetaboAnalyst 5.0- <https://www.metaboanalyst.ca/>.

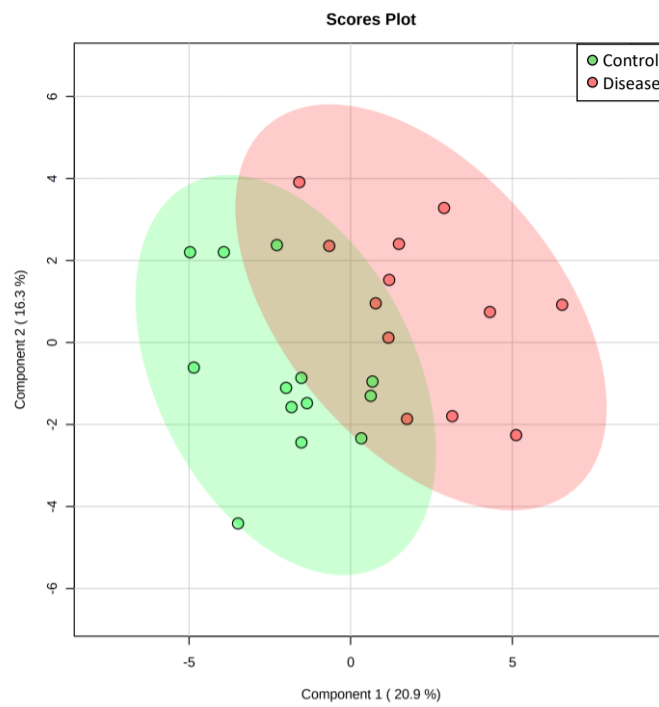

**Fig. S3. Partial Least Squares Discriminant Analysis (PLS-DA)**

PLSDA clustering show 2D score plot for metabolomic sample of HD serum of control vs disease group without outliers. Figure generated using MetaboAnalyst 5.0- <https://www.metaboanalyst.ca/>.

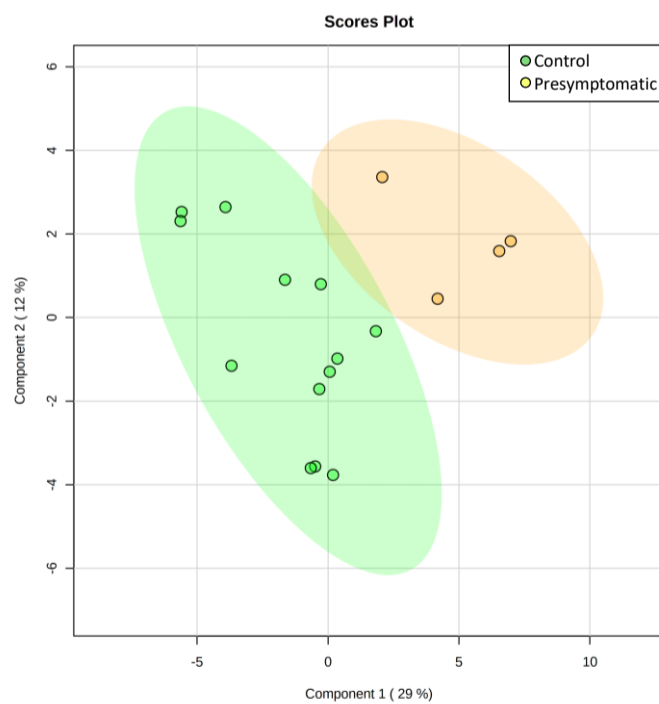

**Fig. S4. Partial Least Squares Discriminant Analysis (PLS-DA)**

PLSDA clustering show 2D score plot for metabolomic sample of HD serum of control vs presymptomatic. Figure generated using MetaboAnalyst 5.0- <https://www.metaboanalyst.ca/>.

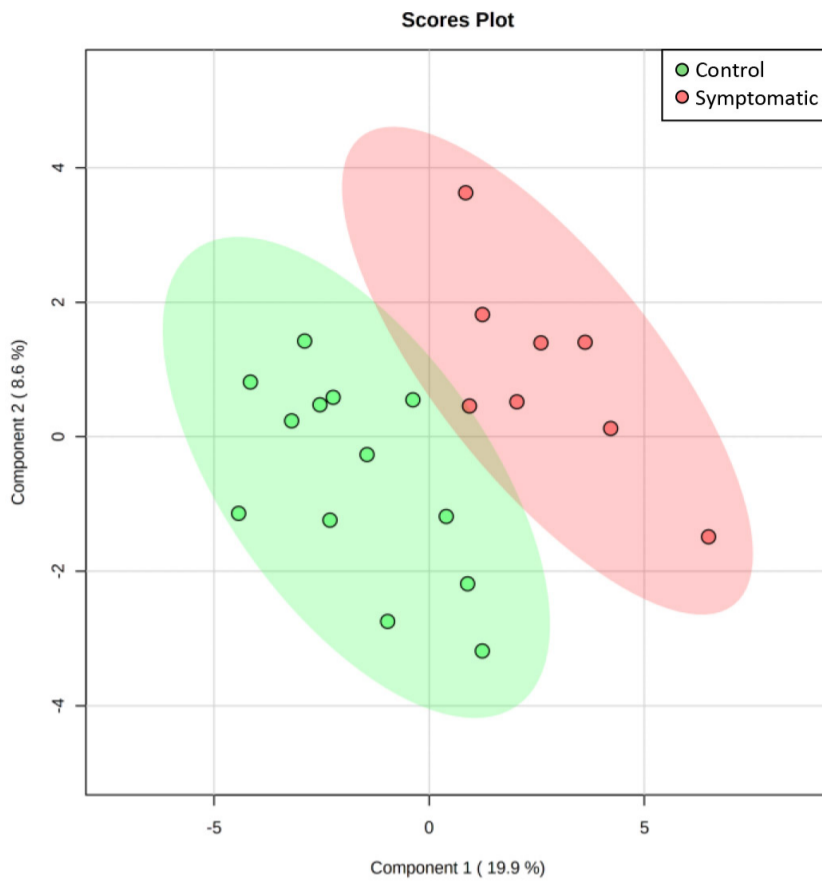

**Fig. S5. Partial Least Squares Discriminant Analysis (PLS-DA)**

PLSDA clustering show 2D score plot for metabolomic sample of HD serum of presymptomatic vs symptomatic. Figure generated using MetaboAnalyst 5.0- <https://www.metaboanalyst.ca/>.

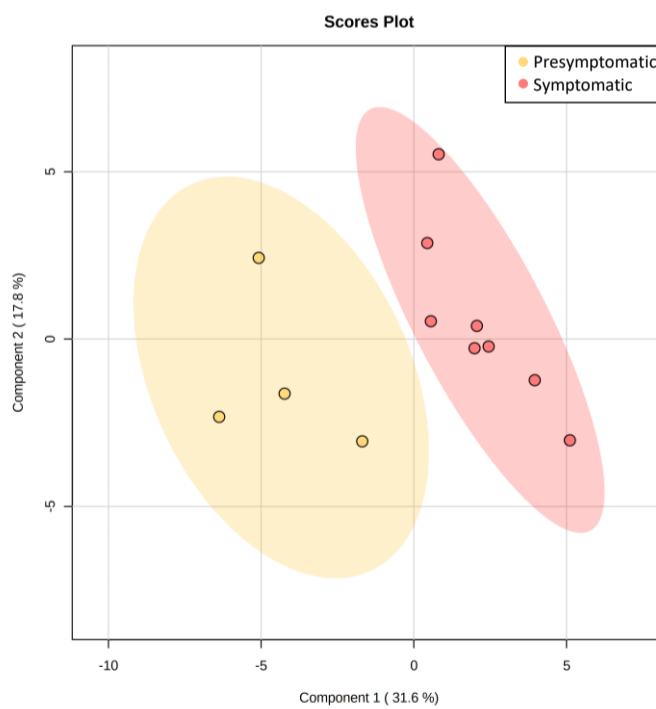

**Fig. S6. Partial Least Squares Discriminant Analysis (PLS-DA)**

PLSDA clustering show 2D score plot for metabolomic sample of HD serum of presymptomatic vs symptomatic. Figure generated using MetaboAnalyst 5.0- <https://www.metaboanalyst.ca/>.

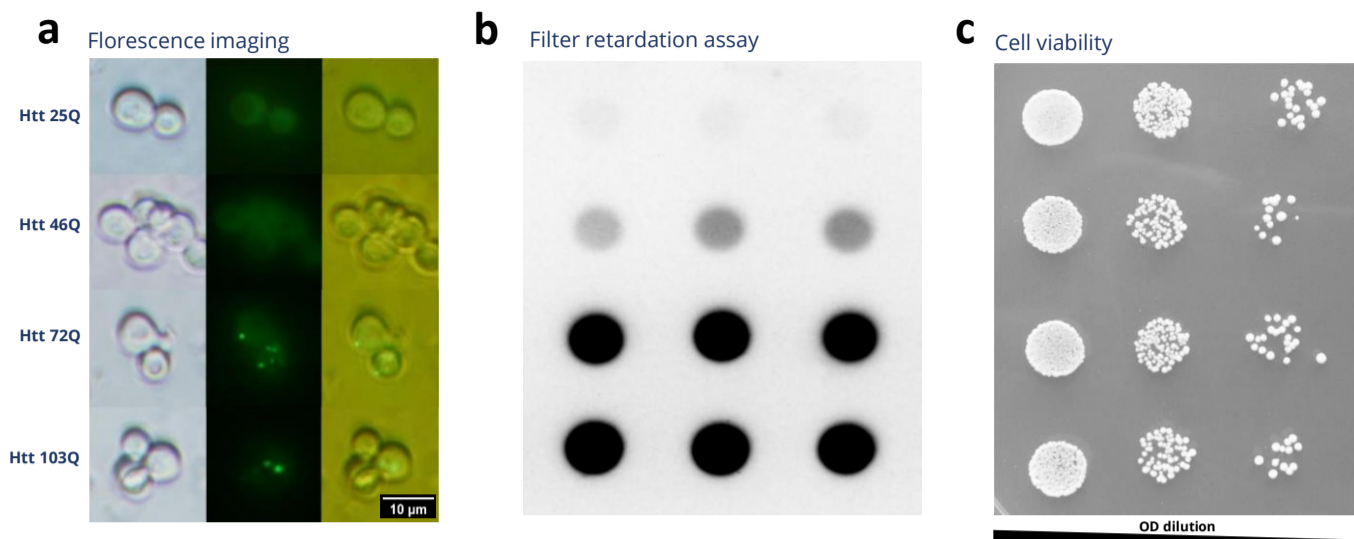

**Fig. S7. Yeast model of HD.**

(a) Yeast strain BY4741 transformed with the Htt 25Q, 46Q, 72Q and 103Q plasmid tagged with GFP showing aggregation as foci. Intense foci is observed in case of 72Q and 103Q where as it is more diffused in 46Q transformed cells, 25Q serving as the control (n=3). (b) Filter retardation assay (Dot blot assay) of these PolyQ transformed yeast show more aggregation in 72Q and 103Q compared to 46Q or 25Q (n=3). (c) The cell viability was determined with spot test showing PolyQ transformation have no detrimental effect on cell growing with increase in PolyQ length (n=3).

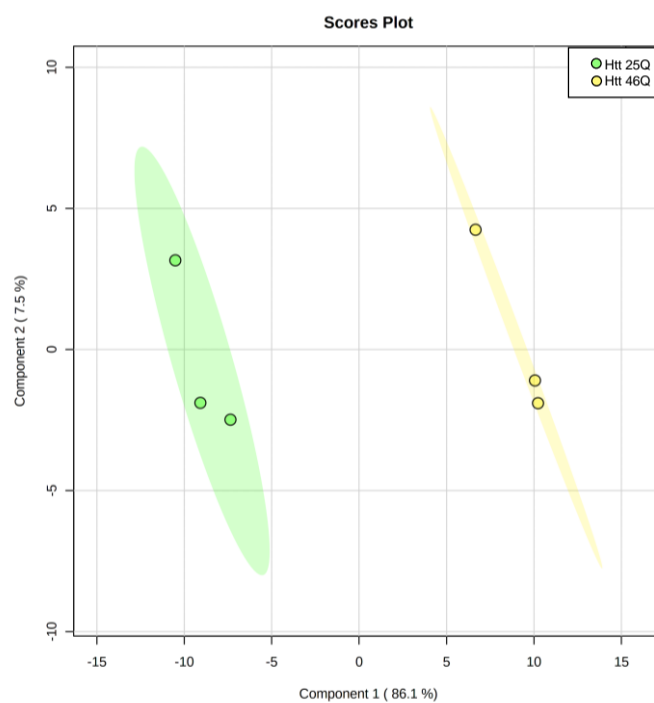

**Fig. S8. Partial Least Squares Discriminant Analysis (PLS-DA)**

PLSDA clustering show 2D score plot for metabolomic sample (negative mode) of Htt 25Q vs 46Q. Figure generated using MetaboAnalyst 5.0- <https://www.metaboanalyst.ca/>.

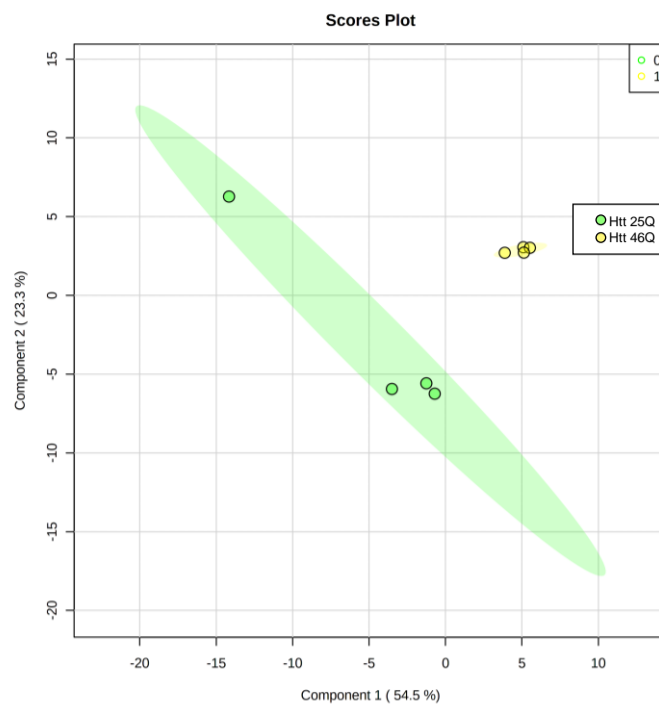

**Fig. S9. Partial Least Squares Discriminant Analysis (PLS-DA)**

PLSDA clustering show 2D score plot for metabolomic sample (positive mode) of Htt 25Q vs 46. Figures generated using MetaboAnalyst 5.0-<https://www.metaboanalyst.ca/>.

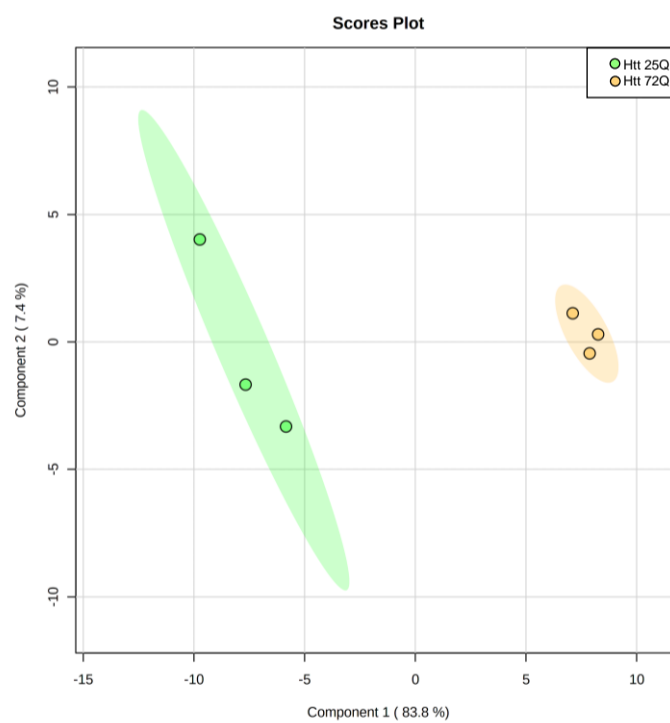

**Fig. S10. Partial Least Squares Discriminant Analysis (PLS-DA)**

PLSDA clustering show 2D score plot for metabolomic sample (negative mode) of Htt 25Q vs 72Q. Figure generated using MetaboAnalyst 5.0- <https://www.metaboanalyst.ca/>.

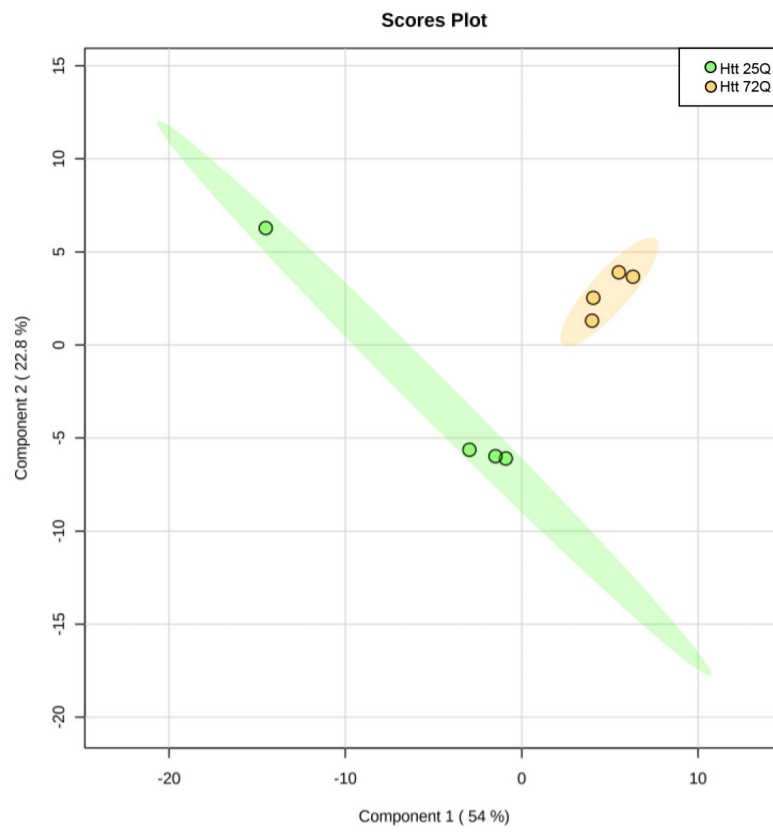

**Fig. S11. Partial Least Squares Discriminant Analysis (PLS-DA)**

PLSDA clustering show 2D score plot for metabolomic sample (positive mode) of Htt 25Q vs 72Q. Figure generated using MetaboAnalyst 5.0-<https://www.metaboanalyst.ca/>.

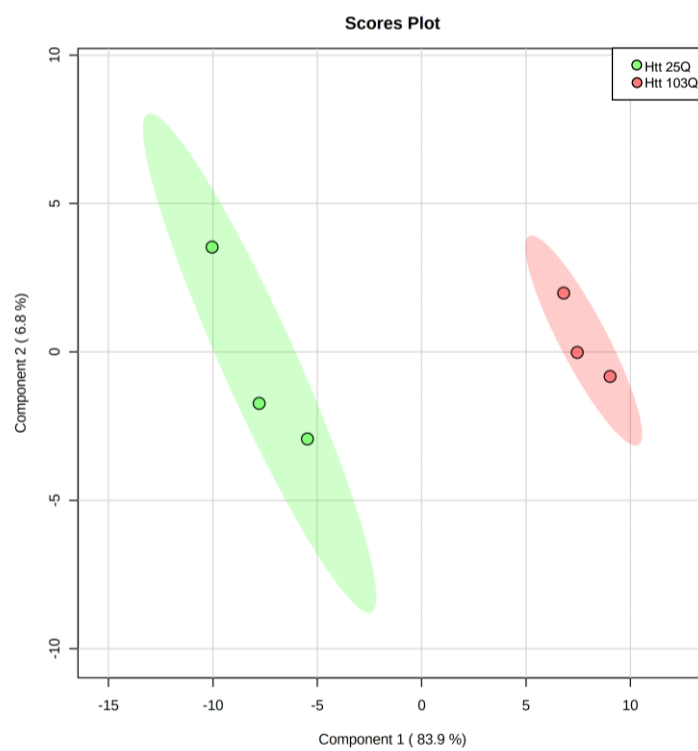

**Fig. S12. Partial Least Squares Discriminant Analysis (PLS-DA)**

PLSDA clustering show 2D score plot for metabolomic sample (negative mode) of Htt 25Q vs 103Q. Figure generated using MetaboAnalyst 5.0- <https://www.metaboanalyst.ca/>.

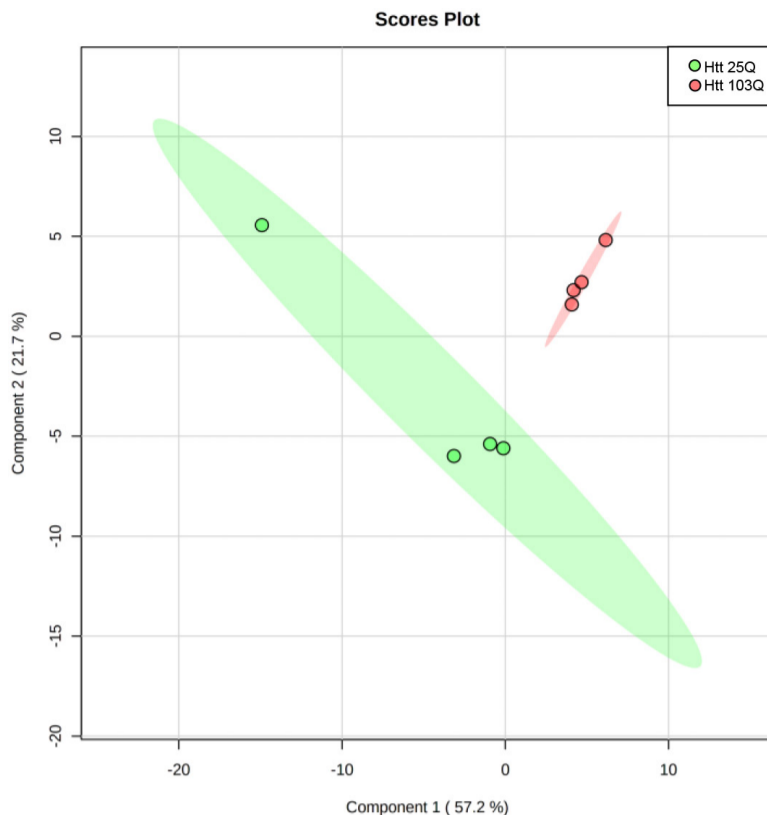

**Fig. S13. Partial Least Squares Discriminant Analysis (PLS-DA)**

PLSDA clustering show 2D score plot for metabolomic sample (negative mode) of Htt 25Q vs 103Q. Figures generated using MetaboAnalyst 5.0- <https://www.metaboanalyst.ca/>.

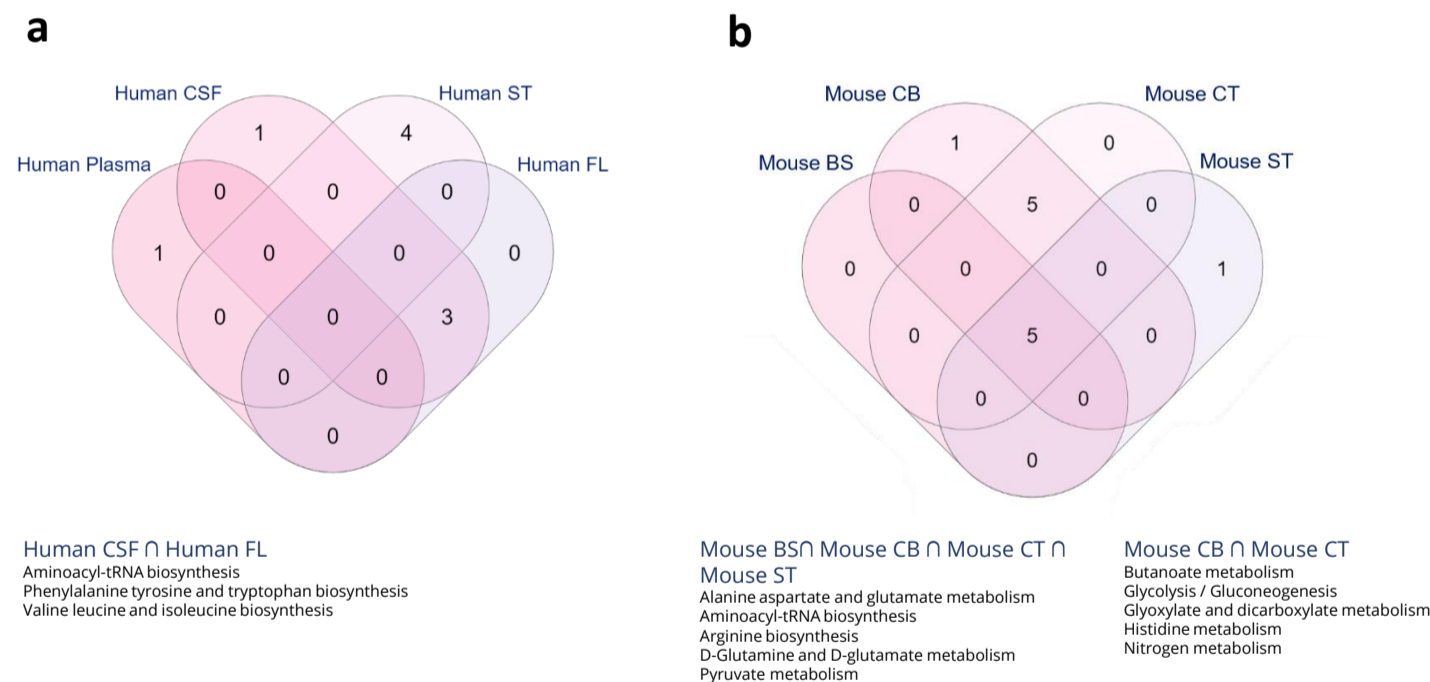

**Fig. S14. Enriched pathway comparison (Metabolomics)**

Illustration of common pathways between samples of (A) HD patient and (B) Mouse model of HD. The intersection represents common pathways enriched among samples. (The comparative Venn diagram illustration was generated using online tool-<https://www.molbiotools.com/listcompare.html> ).



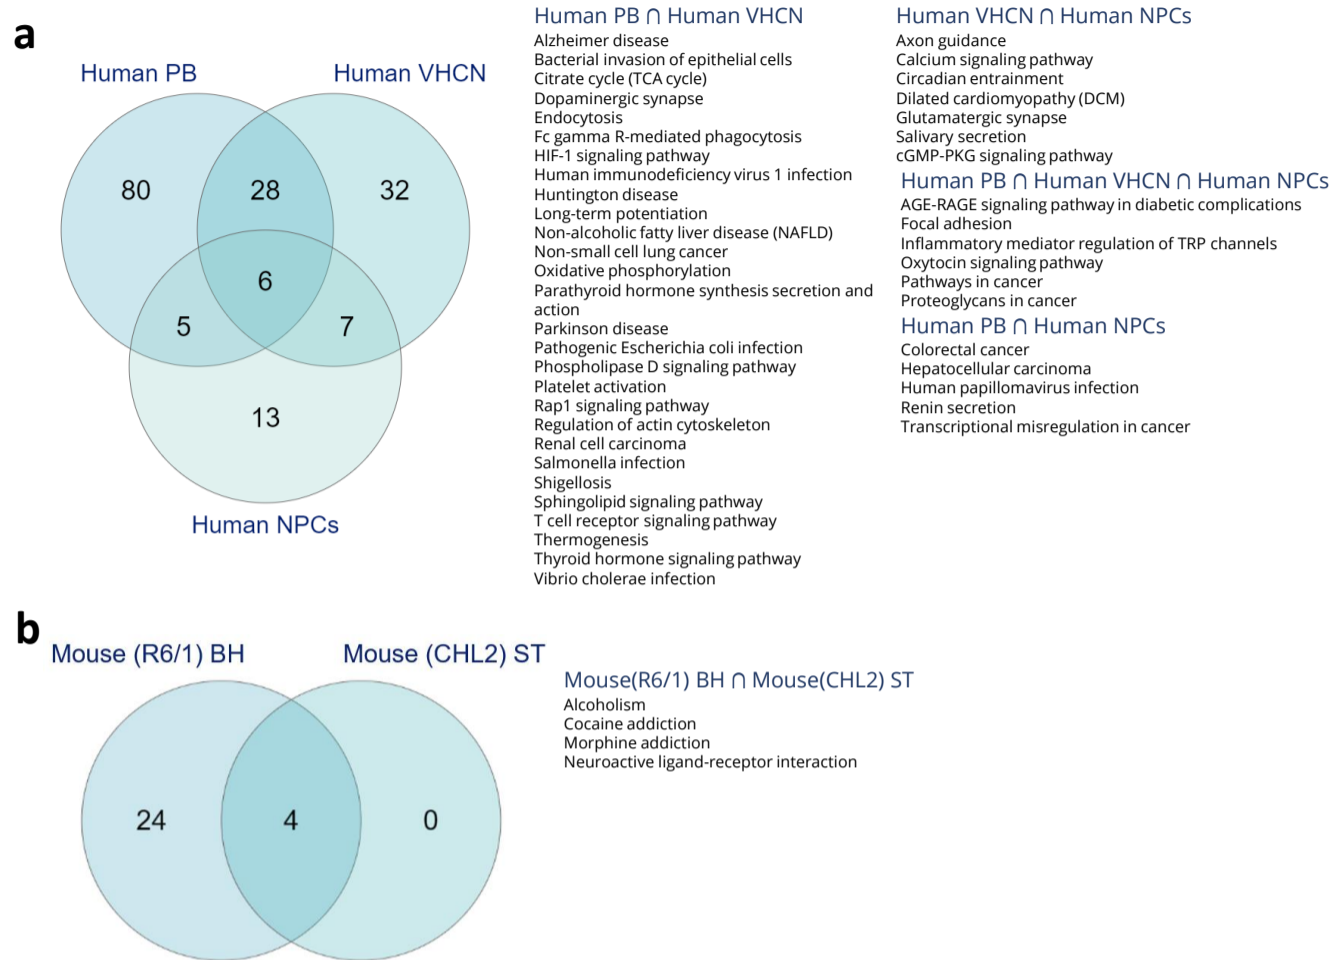

**Fig. S15. Enriched pathway comparison (Transcriptomics)**

Illustration of common pathways enriched between (A) HD patient datasets and (B) datasets of Mouse model of HD. Intersections representing common pathways deregulate among samples. (The Venn diagrams were created using <https://www.molbiotools.com/listcompare.html> an online tool).

Yeast upregulated genes (RED) and downregulated genes (BLUE) pathway enrichment

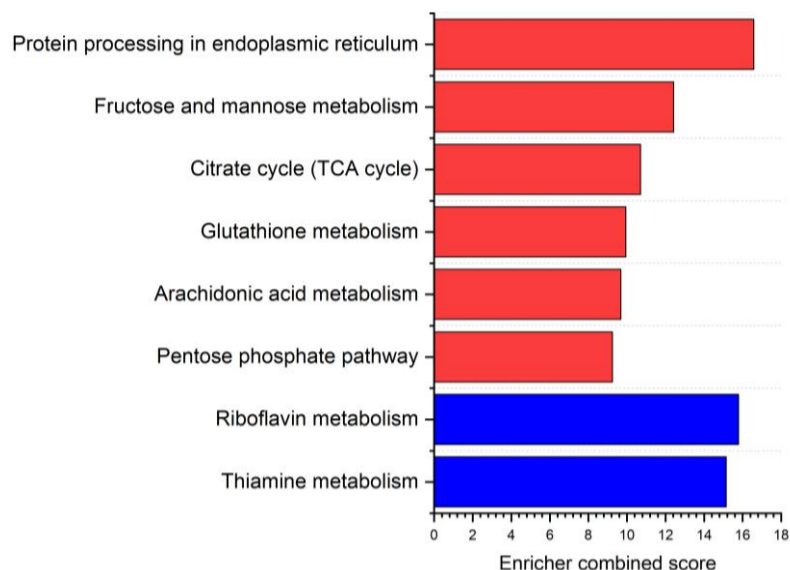

**Fig. S16. Enriched Pathway**

The chart illustrates results from the enrichment analysis of the upregulated (shown in red) and down regulated (shown in blue) genes in the disease condition. The pathways are sorted based on their combined score ranking. (Histograms plotted using OriginPro 8.5).

Mouse striatum dataset downregulated genes (BLUE) pathway enrichment

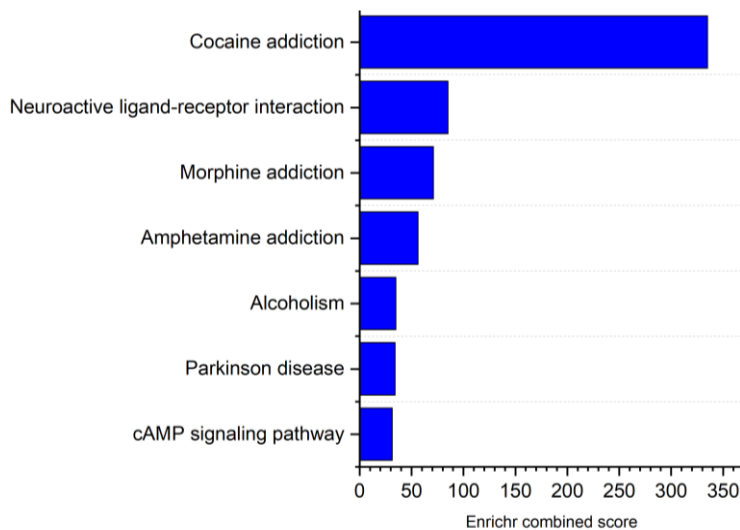

**Fig. S17. Enriched Pathway**

The chart illustrates results from the enrichment analysis of the negatively deregulated (downregulated) genes in the disease condition. The pathways are sorted based on their combined score ranking. (Histograms plotted using OriginPro 8.5).

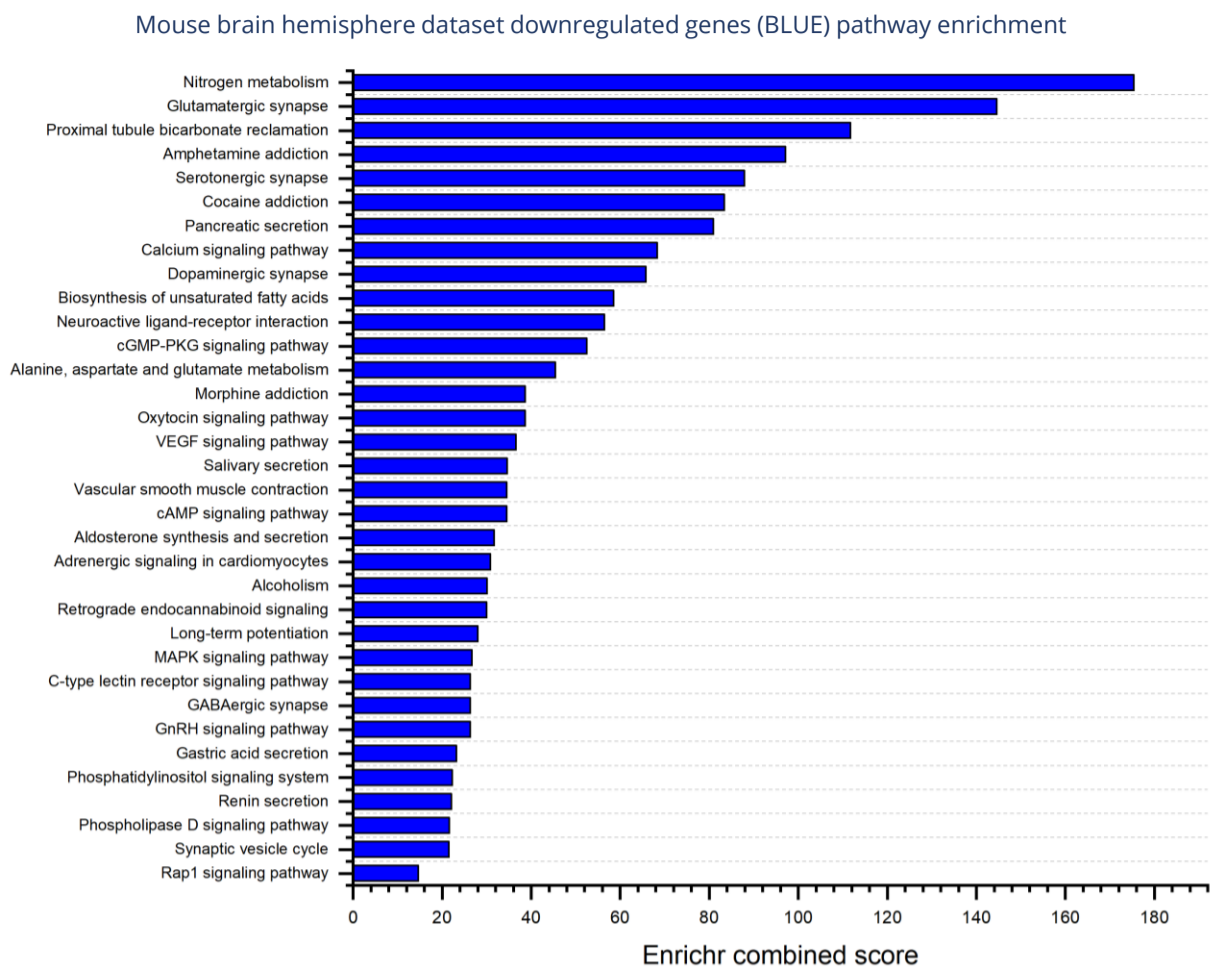

**Fig. S18. Enriched Pathway**

The chart illustrates results from the enrichment analysis of the negatively deregulated (down regulated) genes in the disease condition. The pathways are sorted based on their combined score ranking. (Histograms plotted using OriginPro 8.5).

Human neuronal progenitor cells dataset upregulated genes (RED) and downregulated genes (BLUE) pathway enrichment

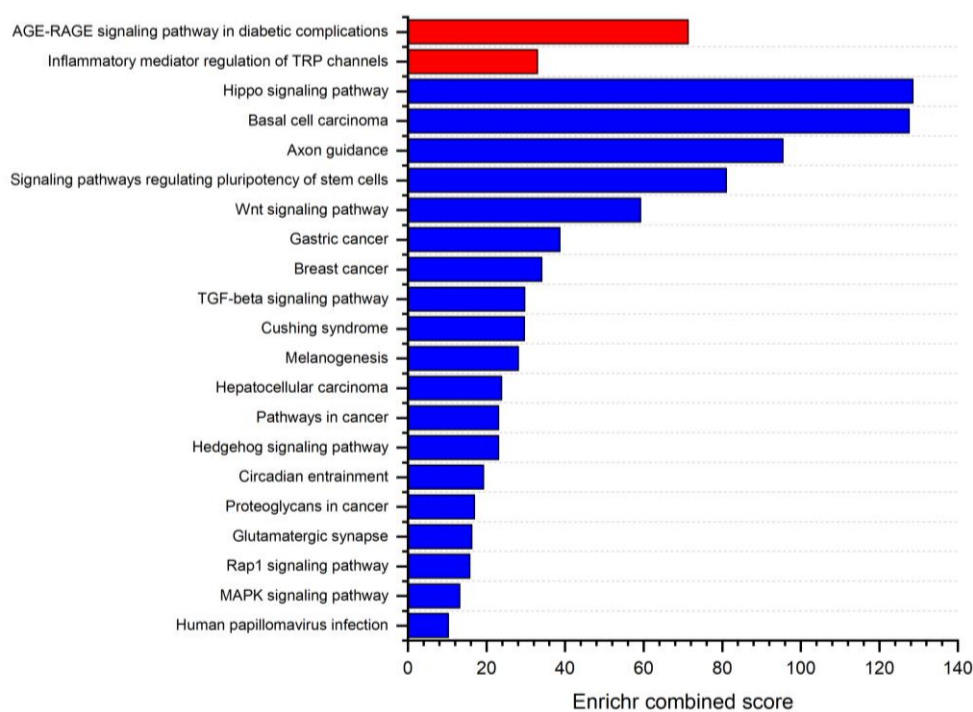

**Fig. S19. Enriched Pathway**

The chart illustrates results from the enrichment analysis of the upregulated (shown in red) and down regulated (shown in blue) genes in the disease condition. The pathways are sorted based on their combined score ranking. (Histograms plotted using OriginPro 8.5).

Human peripheral blood dataset upregulated genes and downregulated genes pathway enrichment

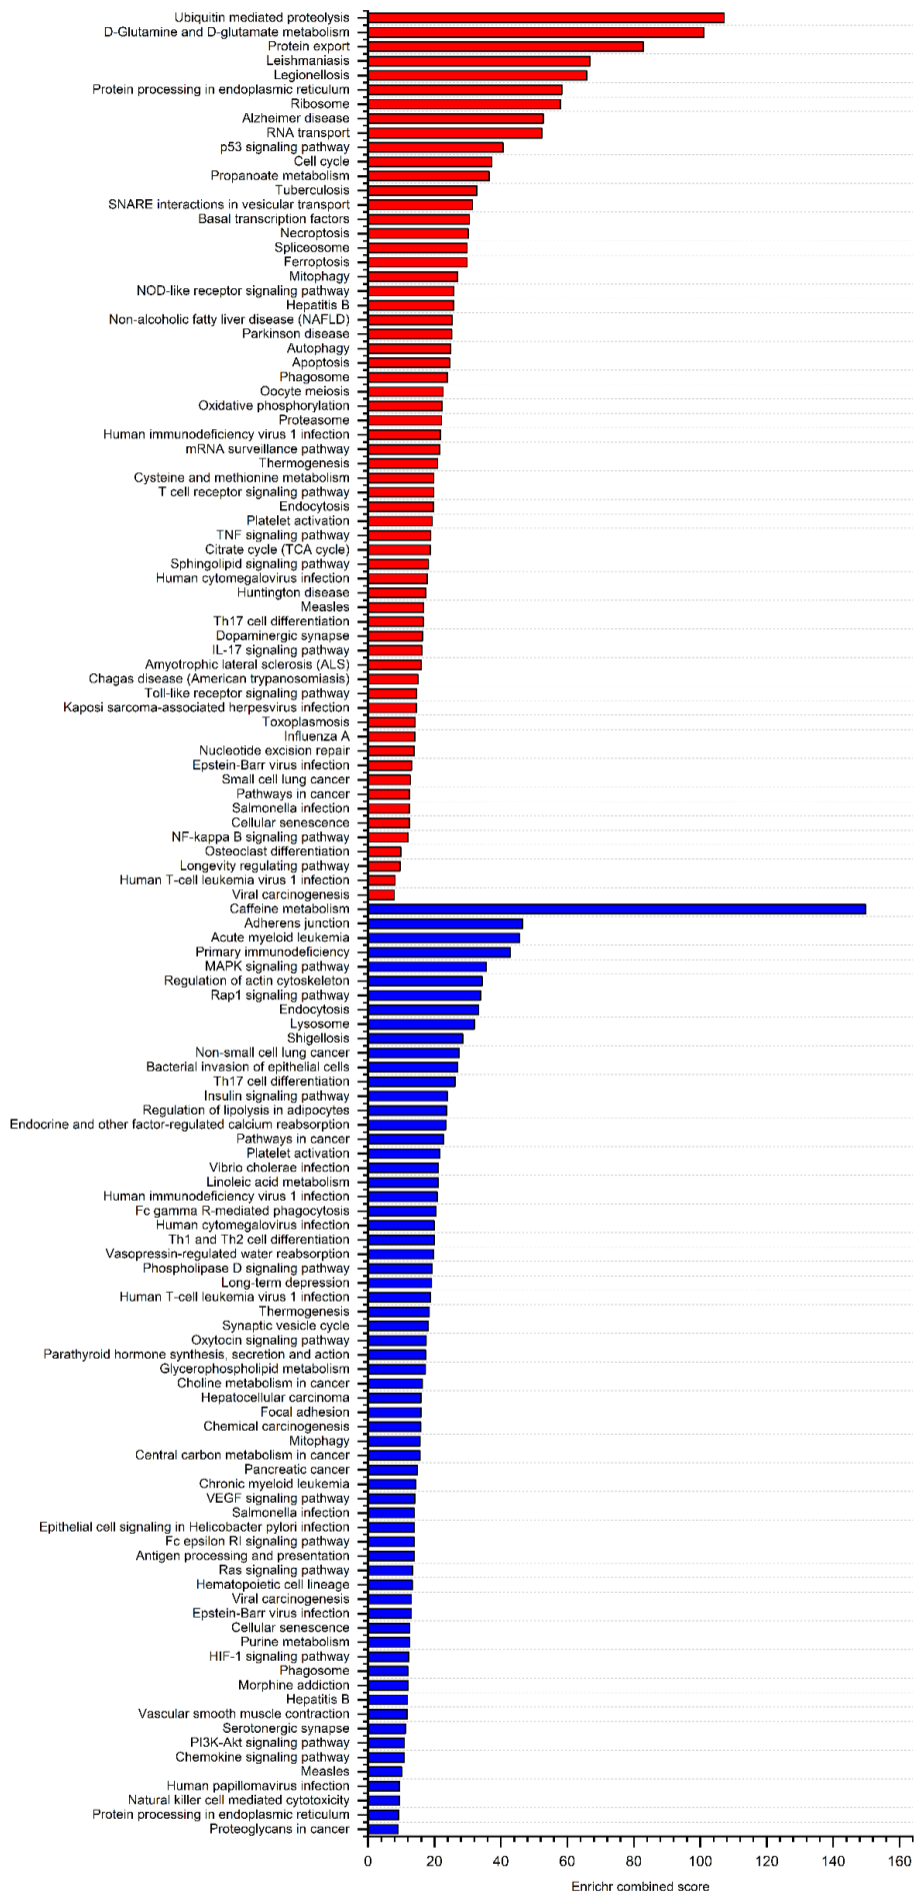

**Fig. S20. Enriched Pathway**

The chart illustrates results from the enrichment analysis of the upregulated (shown in red) and down regulated (shown in blue) genes in the disease condition. The pathways are sorted based on their combined score ranking. (Histograms plotted using OriginPro 8.5).

Human ventral head of caudate nucleus dataset upregulated genes and downregulated genes pathway enrichment

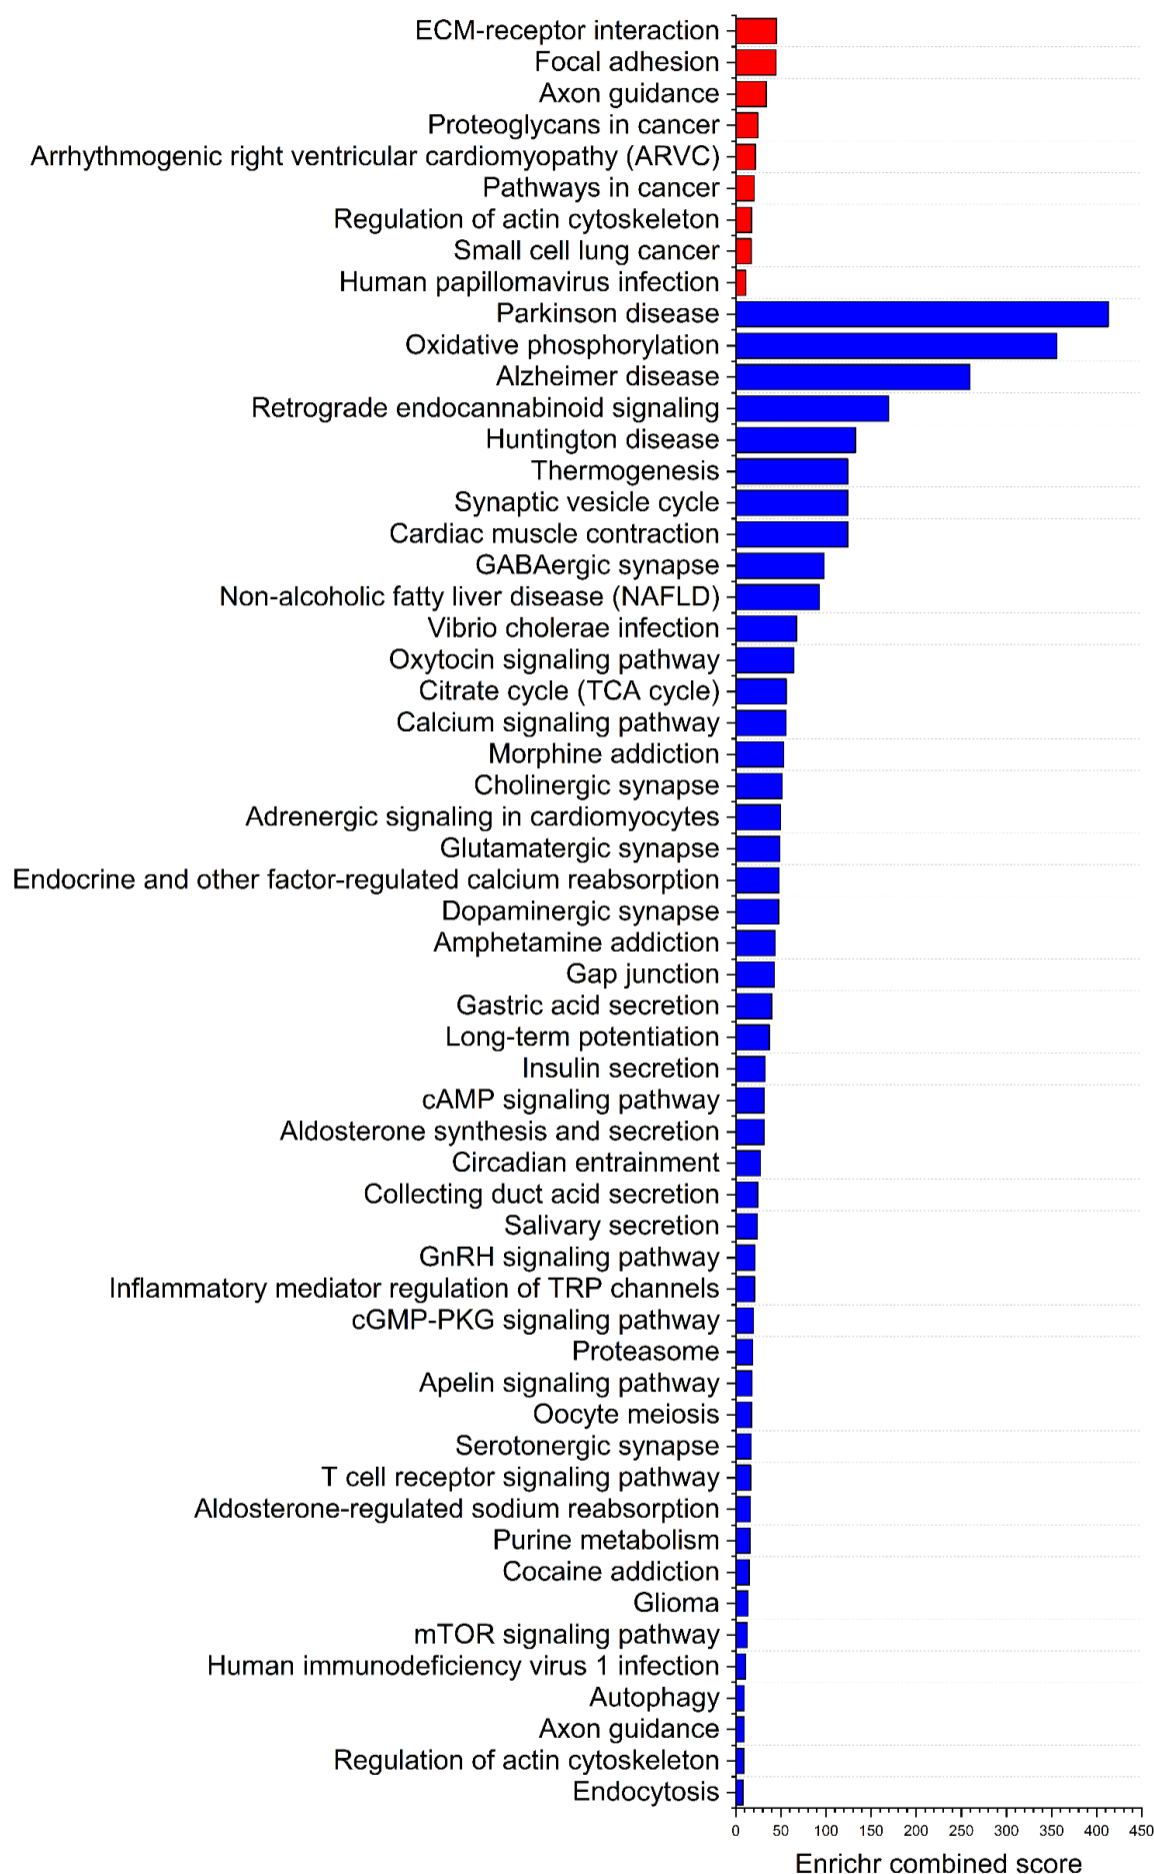

**Fig. S21. Enriched Pathway**

The chart illustrates results from the enrichment analysis of the upregulated (shown in red) and down regulated (shown in blue) genes in the disease condition. The pathways are sorted based on their combined score ranking. (Histograms plotted using OriginPro 8.5).

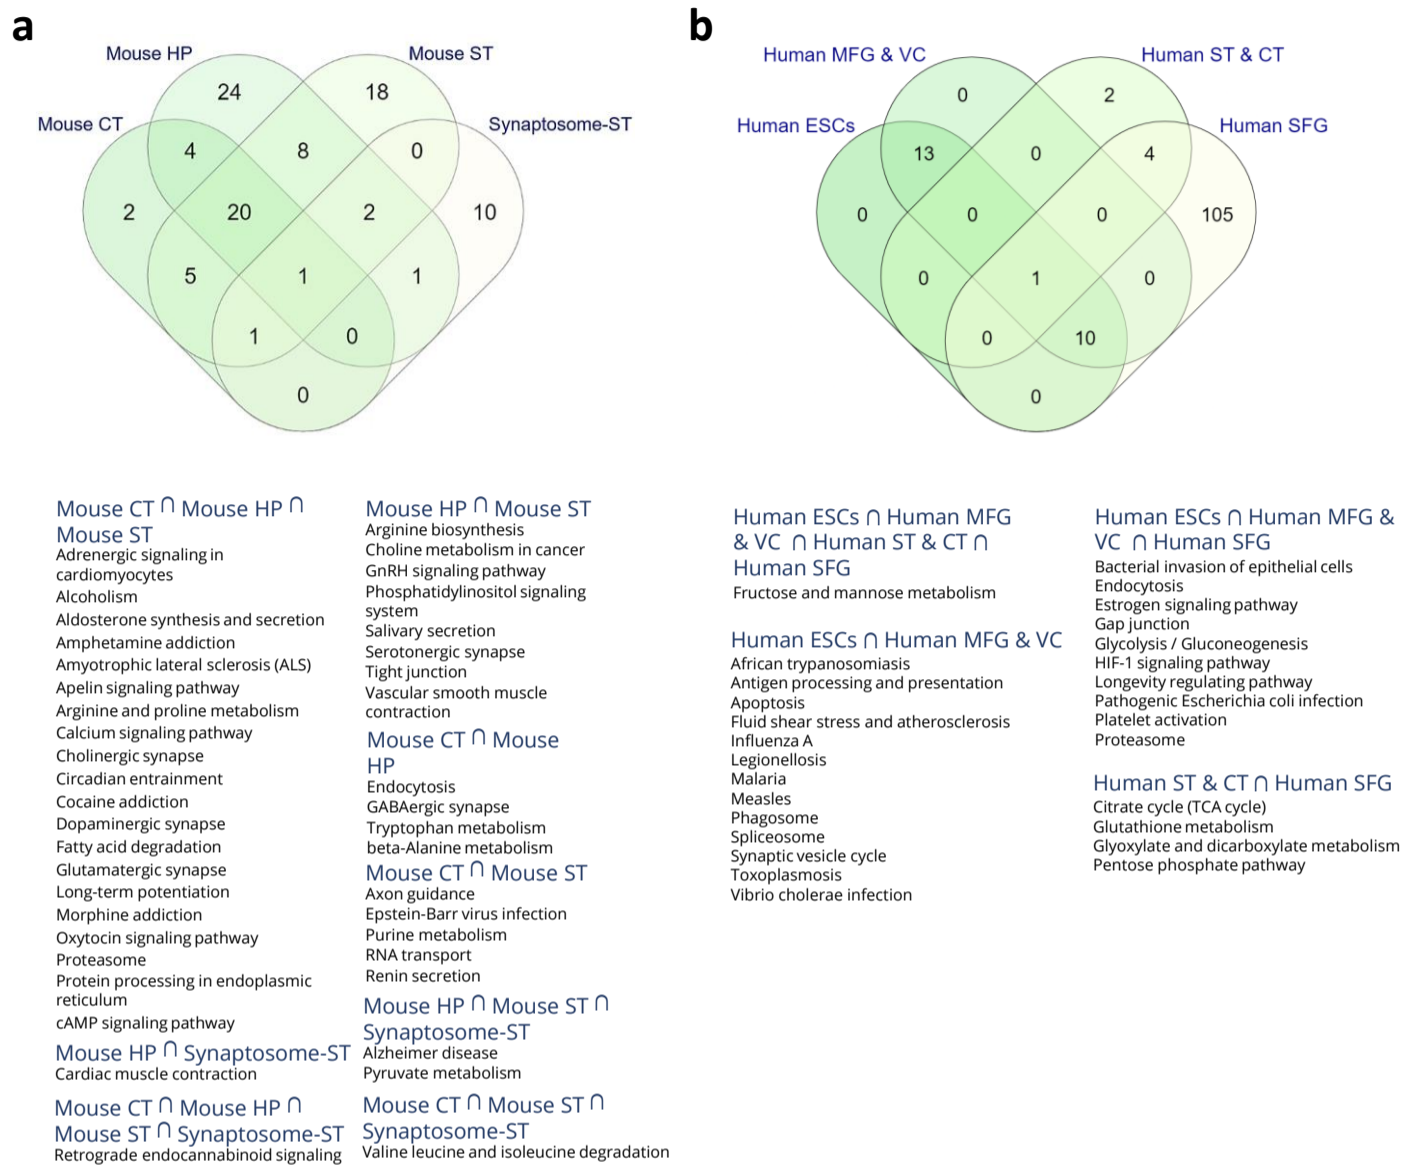

**Fig. S22. Enriched pathway comparison (Proteomics)**

Illustration of common pathways between samples of (a) Mouse model of HD and (b) HD patient. The intersection represents common pathways enriched among samples. (Venn diagrams for comparison was created using an online tool-<https://www.molbiotools.com/listcompare.html> ).

### Table S1. Data Summary table

Details on all the datasets of transcriptomics, proteomics and metabolomics used in the study. (Table made in Microsoft Excel).

| Transcriptomics          |                                            |                                                                                                           |                                                                                                                                                                                                                   |
|--------------------------|--------------------------------------------|-----------------------------------------------------------------------------------------------------------|-------------------------------------------------------------------------------------------------------------------------------------------------------------------------------------------------------------------|
| Organism                 | Sample                                     | References                                                                                                | Paper title                                                                                                                                                                                                       |
| Saccharomyces cerevisiae | Whole cell                                 | GSE18644                                                                                                  | Functional gene expression profiling in yeast implicates translational dysfunction in mutant huntingtin toxicity                                                                                                  |
| Mus musculus             | Brain hemisphere                           | GSE3621                                                                                                   | Brain gene expression correlates with changes in behavior in the R6/1 mouse model of Huntington's disease                                                                                                         |
|                          | Striatum                                   | GSE10202                                                                                                  | Mutant huntingtin's effects on striatal gene expression in Mouse recapitulate changes observed in human Huntington's disease brain and do not differ with mutant huntingtin length or wild-type huntingtin dosage |
| Homo sapiens             | Ventral head of caudate nucleus            | GSE26927                                                                                                  | Selection of novel reference genes for use in the human central nervous system: a BrainNet Europe Study                                                                                                           |
|                          | Peripheral blood sample                    | GSE1751                                                                                                   | Genome-wide expression profiling of human blood reveals biomarkers for Huntington's disease                                                                                                                       |
|                          | iPSCs & derived NPCs                       | GSE93767                                                                                                  | Reversal of Phenotypic Abnormalities by CRISPR/Cas9-Mediated Gene Correction in Huntington Disease Patient-Derived Induced Pluripotent Stem Cells                                                                 |
| Proteomics               |                                            |                                                                                                           |                                                                                                                                                                                                                   |
| Mus musculus             | Striatum<br>Cortex<br>Hippocampus          | PXD008099                                                                                                 | Integrative Characterization of the R6/2 Mouse Model of Huntington's Disease Reveals Dysfunctional Astrocyte Metabolism                                                                                           |
|                          | Synaptosomes from Striatum and Cortex      | <a href="https://doi.org/10.1016/j.nbd.2020.104950">https://doi.org/10.1016/j.nbd.2020.104950</a>         | Protein changes in synaptosomes of Huntington's disease knock-in Mouse are dependent on age and brain region                                                                                                      |
| Homo sapiens             | Superior frontal gyrus tissue              | <a href="https://doi.org/10.1021/acs.jproteome.6b00448">https://doi.org/10.1021/acs.jproteome.6b00448</a> | Quantitative Proteomic Analysis Reveals Similarities between Huntington's Disease (HD) and Huntington's Disease-Like 2 (HDL2) Human Brains                                                                        |
|                          | Middle frontal gyrus and the visual cortex | 10.3233/JHD-120044                                                                                        | Proteomic Analysis of the Human Brain in Huntington's Disease Indicates Pathogenesis by Molecular Processes Linked to other Neurodegenerative Diseases and to Type-2 Diabetes                                     |
|                          | Striatum and cortex                        | 10.1016/j.freeradbiomed.2008.05.014                                                                       | Proteomic and oxidative stress analysis in human brain samples of Huntington disease                                                                                                                              |
|                          | Embryonic Stem Cells                       | <a href="https://doi.org/10.1021/pr500649m">https://doi.org/10.1021/pr500649m</a>                         | Proteomics of Huntington's Disease-Affected Human Embryonic Stem Cells Reveals an Evolving Pathology Involving Mitochondrial Dysfunction and Metabolic Disturbances                                               |
| Metabolomics             |                                            |                                                                                                           |                                                                                                                                                                                                                   |
| Saccharomyces cerevisiae | Whole cell                                 | <a href="https://doi.org/10.1021/pr900734g">https://doi.org/10.1021/pr900734g</a>                         | Probing the Metabolic Aberrations Underlying Mutant Huntingtin Toxicity in Yeast and Assessing Their Degree of Preservation in Humans and Mouse                                                                   |
| Mus musculus             | Brain region                               | <a href="https://doi.org/10.1021/pr050244a">https://doi.org/10.1021/pr050244a</a>                         | Metabolic Characterization of the R6/2 Transgenic Mouse Model of Huntington's Disease by High-Resolution MAS 1H NMR Spectroscopy                                                                                  |
| Homo sapiens             | Blood plasma                               | <a href="https://doi.org/10.1002/acn3.214">https://doi.org/10.1002/acn3.214</a>                           | A systems-level "misunderstanding": the plasma metabolome in Huntington's disease                                                                                                                                 |
|                          | Cerebrospinal fluid                        | <a href="https://doi.org/10.1038/s41598-019-40186-5">https://doi.org/10.1038/s41598-019-40186-5</a>       | Alterations in the tyrosine and phenylalanine pathways revealed by biochemical profiling in cerebrospinal fluid of Huntington's disease subjects                                                                  |
|                          | Frontal lobe and striatum                  | <a href="https://doi.org/10.1021/acs.jproteome.6b00049">https://doi.org/10.1021/acs.jproteome.6b00049</a> | Novel Metabolite Biomarkers of Huntington's Disease As Detected by High-Resolution Mass Spectrometry                                                                                                              |
|                          | Frontal lobe and striatum                  | <a href="https://doi.org/10.1016/j.bbdis.2018.04.012">https://doi.org/10.1016/j.bbdis.2018.04.012</a>     | Targeted biochemical profiling of brain from Huntington's disease patients reveals novel metabolic pathways of interest                                                                                           |

### Table S2. Patient Data

Details on patient Demographics and clinical information. The patients information has been acquired and modified for previously described table since most of the patients are from the previous cohort (Thota et al., 2021).

| Patient          | Family   | Relation                  | Age at examination | Gender | CAG repeats |    |
|------------------|----------|---------------------------|--------------------|--------|-------------|----|
| Presymptomatic_1 | Family B | Daughter of Symptomatic_8 | 18                 | F      | 45          | 17 |
| Presymptomatic_2 | Family B | Sibling (Patient)         | 39                 | F      | 44          | 17 |
| Presymptomatic_3 | Family B | Sibling (Patient)         | 25                 | M      | 52          | 17 |
| Presymptomatic_4 | Family B | Sibling (Patient)         | 27                 | M      | 47          | 17 |
| Presymptomatic_5 | Family I | Patient                   | 28                 | F      | 44          | 15 |
| Symptomatic_1    | Family H | Patient                   | 40                 | M      | 44          | 17 |
| Symptomatic_2    | Family G | Patient                   | 43                 | M      | 43          | 17 |
| Symptomatic_3    | Family F | Patient                   | 22                 | M      | 62          | 20 |
| Symptomatic_4    | Family E | Patient                   | 27                 | F      | 56          | 17 |
| Symptomatic_5    | Family D | Patient                   | 26                 | M      | 55          | 17 |
| Symptomatic_6    | Family C | Sibling (Patient)         | 41                 | F      | 46          | 17 |
| Symptomatic_7    | Family C | Sibling (Patient)         | 42                 | M      | 47          | 17 |
| Symptomatic_8    | Family B | Sibling (Patient)         | 32                 | F      | 51          | 17 |
| Symptomatic_9    | Family A | Patient                   | 51                 | M      | 43          | 17 |
| Symptomatic_10   | Family J | Patient                   | 50                 | F      | 44          | 21 |
| Symptomatic_11   | Family K | Patient                   | 26                 | F      | 57          | 17 |

**Table S3.** 89 Detected metabolites and Multiple reaction monitoring (MRM) method of HD patient samples analysed in positive ionization mode.

| Compound Name                        | ISD   | Precursor ion | Product ion | Dwell | Frag(V) | CE(V) | Polarity |
|--------------------------------------|-------|---------------|-------------|-------|---------|-------|----------|
| 1-Methyl-Histidine                   | FALSE | 170.0924      | 124         | 3     | 380     | 20    | POSITIVE |
| 2-Aminobutyraldehyde                 | FALSE | 88.0757       | 70.1        | 3     | 380     | 9     | POSITIVE |
| 2-Aminoheptanoic acid                | FALSE | 146.1176      | 100.1       | 3     | 380     | 5     | POSITIVE |
| 2-Aminoocanoic acid                  | FALSE | 160.1332      | 55.3        | 3     | 380     | 21    | POSITIVE |
| 2-Hydroxypyridine                    | FALSE | 96.0444       | 78.1        | 3     | 380     | 17    | POSITIVE |
| 2-Methyl glutamic acid               | FALSE | 162.0761      | 116.1       | 3     | 380     | 9     | POSITIVE |
| 2-Methylbutyrylcarnitine             | FALSE | 246.17        | 187         | 3     | 380     | 15    | POSITIVE |
| 4 Acetamidobutanoic acid             | FALSE | 146.08        | 86.1        | 3     | 380     | 9     | POSITIVE |
| 4 Hydroxybutyric acid                | FALSE | 105.0546      | 45          | 3     | 380     | 5     | POSITIVE |
| 4-Coumarate                          | FALSE | 165.0446      | 119         | 3     | 380     | 10    | POSITIVE |
| 5-Hydroxyindoleacetic acid           | FALSE | 192.0655      | 146         | 3     | 380     | 10    | POSITIVE |
| 5-oxo-proline                        | FALSE | 130.0499      | 84          | 3     | 380     | 10    | POSITIVE |
| Acetyl Carnitine                     | FALSE | 204.123       | 85          | 3     | 380     | 9     | POSITIVE |
| Acetylcholine                        | FALSE | 146.1176      | 43.02       | 3     | 380     | 10    | POSITIVE |
| Adenosine                            | FALSE | 268.1         | 137.1       | 3     | 380     | 12    | POSITIVE |
| Allo-Threonine                       | FALSE | 120.0655      | 74.1        | 3     | 380     | 5     | POSITIVE |
| Aminobutyric acid                    | FALSE | 104.0706      | 44.1        | 3     | 380     | 9     | POSITIVE |
| Arginine                             | FALSE | 175.119       | 70.1        | 3     | 380     | 25    | POSITIVE |
| betaine aldehyde                     | FALSE | 103.0992      | 58          | 3     | 380     | 21    | POSITIVE |
| Betaine                              | FALSE | 118.0863      | 59.2        | 3     | 380     | 17    | POSITIVE |
| Carnitine                            | FALSE | 162.1125      | 60.1        | 3     | 380     | 12    | POSITIVE |
| Choline                              | FALSE | 105.1148      | 45          | 3     | 380     | 21    | POSITIVE |
| citrulline                           | FALSE | 176.103       | 159         | 3     | 380     | 5     | POSITIVE |
| Creatinine                           | FALSE | 114.0662      | 44          | 3     | 380     | 17    | POSITIVE |
| Cytosine                             | FALSE | 112.1         | 95.1        | 3     | 380     | 17    | POSITIVE |
| Deoxy carnitine                      | FALSE | 146.1176      | 60.1        | 3     | 380     | 13    | POSITIVE |
| Dimethyl Arginine                    | FALSE | 203.1503      | 70.1        | 3     | 380     | 29    | POSITIVE |
| DL-Pipecolic acid                    | FALSE | 130.0863      | 84          | 3     | 380     | 18    | POSITIVE |
| Erythrono-1,4-lactone                | FALSE | 119.11        | 91.1        | 3     | 380     | 10    | POSITIVE |
| Ethylmalonate/Methyl Malonate        | FALSE | 133.0495      | 115.04      | 3     | 380     | 10    | POSITIVE |
| Glucosamine/Galactosamine            | FALSE | 180.0866      | 162         | 3     | 380     | 5     | POSITIVE |
| Glutamic acid                        | FALSE | 148.0604      | 84          | 3     | 380     | 17    | POSITIVE |
| Glutamyl alanine                     | FALSE | 219.0975      | 84.1        | 3     | 380     | 21    | POSITIVE |
| Glycine                              | FALSE | 76.0393       | 30          | 3     | 380     | 9     | POSITIVE |
| Gly-Gly                              | FALSE | 133.0608      | 30          | 3     | 380     | 20    | POSITIVE |
| Gly-Leu                              | FALSE | 189.1234      | 130         | 3     | 380     | 10    | POSITIVE |
| Guanidine acetic acid                | FALSE | 118.0611      | 43.1        | 3     | 380     | 40    | POSITIVE |
| Homoserine                           | FALSE | 120.0655      | 74.1        | 3     | 380     | 9     | POSITIVE |
| Hypoxanthine                         | FALSE | 137           | 119         | 3     | 380     | 21    | POSITIVE |
| Isobutyryl Carnitine                 | FALSE | 232.1543      | 85          | 3     | 380     | 21    | POSITIVE |
| Isoleucine                           | FALSE | 132.1019      | 86.1        | 3     | 380     | 9     | POSITIVE |
| Kynurenic acid                       | FALSE | 190.0499      | 144.1       | 3     | 380     | 16    | POSITIVE |
| Kynurenine                           | FALSE | 209.0921      | 192         | 3     | 380     | 5     | POSITIVE |
| L-anthranilic acid                   | FALSE | 139           | 121         | 3     | 380     | 12    | POSITIVE |
| L-Creatinine                         | FALSE | 115.1         | 45.1        | 3     | 380     | 10    | POSITIVE |
| L-Thymine                            | FALSE | 131.1         | 113.9       | 3     | 380     | 15    | POSITIVE |
| Lysine                               | FALSE | 147.1128      | 130.2       | 3     | 380     | 5     | POSITIVE |
| Methylglutaric acid                  | FALSE | 147.0652      | 55.05423    | 3     | 380     | 10    | POSITIVE |
| Myristoleic acid                     | FALSE | 227.2006      | 43.1        | 3     | 380     | 25    | POSITIVE |
| N, N Dimethyl Glycine/Methyl alanin  | FALSE | 104.0706      | 58.1        | 3     | 380     | 12    | POSITIVE |
| N, N Dimethyl Glycine                | FALSE | 104.0706      | 44          | 3     | 380     | 48    | POSITIVE |
| N,N Dimethyl Glycine/Methyl alanine  | FALSE | 104.0706      | 58.1        | 3     | 380     | 9     | POSITIVE |
| N-Acetyl Lysine                      | FALSE | 189.1234      | 84.1        | 3     | 380     | 24    | POSITIVE |
| N-acetylalanine                      | FALSE | 132.0655      | 44.1        | 3     | 380     | 20    | POSITIVE |
| N-acetyl-glutamine                   | FALSE | 189.087       | 130         | 3     | 380     | 17    | POSITIVE |
| N-Acetylorithine                     | FALSE | 175.1077      | 70.1        | 3     | 380     | 29    | POSITIVE |
| Nicotinamide                         | FALSE | 123.0553      | 80.1        | 3     | 380     | 20    | POSITIVE |
| Octonyl Carnitine                    | FALSE | 288.2         | 85          | 3     | 380     | 21    | POSITIVE |
| Oleic acid                           | FALSE | 283.27        | 89.2        | 3     | 380     | 13    | POSITIVE |
| Phenyl alanine                       | FALSE | 166.0963      | 120.1       | 3     | 380     | 13    | POSITIVE |
| Proline                              | FALSE | 116.0706      | 70.1        | 3     | 380     | 17    | POSITIVE |
| Propeonyl Carnitine                  | FALSE | 218.1387      | 85          | 3     | 380     | 17    | POSITIVE |
| purine                               | FALSE | 121.0509      | 94          | 3     | 380     | 25    | POSITIVE |
| Sarcosine/Alanine                    | FALSE | 90.055        | 72.1        | 3     | 380     | 9     | POSITIVE |
| Serine                               | FALSE | 106.0499      | 60.1        | 3     | 380     | 9     | POSITIVE |
| Spermidine                           | FALSE | 146.1652      | 72.1        | 3     | 380     | 17    | POSITIVE |
| Tryptophan                           | FALSE | 205.1         | 146.1       | 3     | 380     | 10    | POSITIVE |
| Tyrosine                             | FALSE | 182.0812      | 136.1       | 3     | 380     | 9     | POSITIVE |
| Urea                                 | FALSE | 61.0396       | 44          | 3     | 380     | 10    | POSITIVE |
| Valine                               | FALSE | 118.0863      | 72.2        | 3     | 380     | 9     | POSITIVE |
| Xanthine                             | FALSE | 153.04        | 110         | 3     | 380     | 21    | POSITIVE |
| 4-Methyl-2-oxo pentanoic acid        | FALSE | 131.0703      | 71          | 3     | 380     | 10    | POSITIVE |
| Adenine                              | FALSE | 136.6         | 119         | 3     | 380     | 10    | POSITIVE |
| Asparagine                           | FALSE | 133.0608      | 74          | 3     | 380     | 13    | POSITIVE |
| Cystathionine                        | FALSE | 223.0747      | 134.1       | 3     | 380     | 8     | POSITIVE |
| Cystine                              | FALSE | 241.03        | 152         | 3     | 380     | 9     | POSITIVE |
| Glutamine                            | FALSE | 147.0764      | 130.1       | 3     | 380     | 5     | POSITIVE |
| Glycerol 3-phosphate                 | FALSE | 173.02        | 132         | 3     | 380     | 5     | POSITIVE |
| Heptanoyl Carnitine                  | FALSE | 260.2         | 201.2       | 3     | 380     | 9     | POSITIVE |
| Histamine                            | FALSE | 112.0869      | 95.1        | 3     | 380     | 13    | POSITIVE |
| Histidine                            | FALSE | 156.0768      | 110.1       | 3     | 380     | 9     | POSITIVE |
| Isovaleryl Carnitine                 | FALSE | 246.2         | 85          | 3     | 380     | 17    | POSITIVE |
| Myo-Inositol                         | FALSE | 181.07        | 139.9       | 3     | 380     | 5     | POSITIVE |
| N, N Dimethyl Glycine/Methyl alanine | FALSE | 104.0706      | 58.1        | 3     | 380     | 12    | POSITIVE |
| N-acetyl Glucosamine 6 Phos          | FALSE | 302.0635      | 284.1       | 3     | 380     | 5     | POSITIVE |
| Palmitic acid                        | FALSE | 257           | 57          | 3     | 380     | 40    | POSITIVE |
| Quinic acid                          | FALSE | 193.0707      | 111.04      | 3     | 380     | 10    | POSITIVE |
| Sarcosine/Alainine                   | FALSE | 90.055        | 44.1        | 3     | 380     | 20    | POSITIVE |
| Uracil                               | FALSE | 113           | 72          | 3     | 380     | 4     | POSITIVE |



**Table S4.** 109 Detected metabolites and Multiple reaction monitoring (MRM) method of Yeast samples analysed in positive ionization mode.

| Compound Name                             | ISD   | Precursor ion | Product ion | Dwell | Frag(V) | CE(V) | Polarity |
|-------------------------------------------|-------|---------------|-------------|-------|---------|-------|----------|
| 1-Stearoyl-sn-glycero-3-phosphocholine    | FALSE | 524.3711      | 184.1       | 3     | 380     | 25    | POSITIVE |
| 2-Aminobutyraldehyde                      | FALSE | 88.0757       | 70.1        | 3     | 380     | 9     | POSITIVE |
| 2-Hydroxypyridine                         | FALSE | 96.0444       | 78.1        | 3     | 380     | 17    | POSITIVE |
| 2-Methyl glutamic acid                    | FALSE | 162.0761      | 116.1       | 3     | 380     | 9     | POSITIVE |
| 3-phospho-serine                          | FALSE | 186.0162      | 88          | 3     | 380     | 12    | POSITIVE |
| 4 Acetamidobutanoic acid                  | FALSE | 146.08        | 86.1        | 3     | 380     | 9     | POSITIVE |
| 4 Hydroxybutyric acid                     | FALSE | 105.0546      | 45          | 3     | 380     | 5     | POSITIVE |
| 4-Coumarate                               | FALSE | 165.0446      | 119         | 3     | 380     | 10    | POSITIVE |
| 4-Methyl-2-oxo pentanoic acid             | FALSE | 131.0703      | 71          | 3     | 380     | 10    | POSITIVE |
| 5-Hydroxyindoleacetic acid                | FALSE | 192.0655      | 146         | 3     | 380     | 10    | POSITIVE |
| 5-oxo-proline                             | FALSE | 130.0499      | 84          | 3     | 380     | 10    | POSITIVE |
| Acetyl Carnitine                          | FALSE | 204.123       | 85          | 3     | 380     | 9     | POSITIVE |
| Acetylcholine                             | FALSE | 146.1176      | 43.02       | 3     | 380     | 10    | POSITIVE |
| Adenine                                   | FALSE | 136.6         | 119         | 3     | 380     | 10    | POSITIVE |
| Adenosine                                 | FALSE | 268.1         | 137.1       | 3     | 380     | 12    | POSITIVE |
| Allo-Threonine                            | FALSE | 120.0655      | 74.1        | 3     | 380     | 5     | POSITIVE |
| Aminobutyric acid                         | FALSE | 104.0706      | 44.1        | 3     | 380     | 9     | POSITIVE |
| Aminobutyric acid                         | FALSE | 104.0706      | 69          | 3     | 380     | 22    | POSITIVE |
| aminoimidazole carboxamide ribonucleotide | FALSE | 339.07        | 110         | 3     | 380     | 32    | POSITIVE |
| AMP                                       | FALSE | 348.0704      | 136         | 3     | 380     | 17    | POSITIVE |
| Arginine                                  | FALSE | 175.119       | 70.1        | 3     | 380     | 25    | POSITIVE |
| Asparagine                                | FALSE | 133.0608      | 74          | 3     | 380     | 13    | POSITIVE |
| Asparagine-15N2                           | FALSE | 135           | 117         | 3     | 380     | 15    | POSITIVE |
| Betaine                                   | FALSE | 118.0863      | 59.2        | 3     | 380     | 17    | POSITIVE |
| betaine aldehyde                          | FALSE | 103.0992      | 58          | 3     | 380     | 21    | POSITIVE |
| Carnitine                                 | FALSE | 162.1125      | 60.1        | 3     | 380     | 12    | POSITIVE |
| Choline                                   | FALSE | 105.1148      | 45          | 3     | 380     | 21    | POSITIVE |
| citrulline                                | FALSE | 176.103       | 159         | 3     | 380     | 5     | POSITIVE |
| Creatinine                                | FALSE | 114.0662      | 44          | 3     | 380     | 17    | POSITIVE |
| Cystathionine                             | FALSE | 223.0747      | 134.1       | 3     | 380     | 8     | POSITIVE |
| Cysteine                                  | FALSE | 122.027       | 76          | 3     | 380     | 9     | POSITIVE |
| Cystine                                   | FALSE | 241.03        | 152         | 3     | 380     | 9     | POSITIVE |
| Cytidine 5'-Monophosphate (5-CMP)         | FALSE | 324.0591      | 112         | 3     | 380     | 9     | POSITIVE |
| Cytosine                                  | FALSE | 112.1         | 95.1        | 3     | 380     | 17    | POSITIVE |
| Deoxy carnitine                           | FALSE | 146.1176      | 60.1        | 3     | 380     | 13    | POSITIVE |
| dGMP                                      | FALSE | 348.0704      | 135         | 3     | 380     | 38    | POSITIVE |
| Dimethyl Arginine                         | FALSE | 203.1503      | 70.1        | 3     | 380     | 29    | POSITIVE |
| DL-Pipecolic acid                         | FALSE | 130.0863      | 84          | 3     | 380     | 18    | POSITIVE |
| Erythrono-1,4-lactone                     | FALSE | 119.11        | 91.1        | 3     | 380     | 10    | POSITIVE |
| Ethylmalonate/Methyl Malonate             | FALSE | 133.0495      | 115.04      | 3     | 380     | 10    | POSITIVE |
| Glucosamine/Galactosamine                 | FALSE | 180.0866      | 162         | 3     | 380     | 5     | POSITIVE |
| Glu-Glu                                   | FALSE | 277.103       | 84.04       | 3     | 380     | 10    | POSITIVE |
| Glutamic acid                             | FALSE | 148.0604      | 84          | 3     | 380     | 17    | POSITIVE |
| Glutamine                                 | FALSE | 147.0764      | 130.1       | 3     | 380     | 5     | POSITIVE |
| Glutamyl alanine                          | FALSE | 219.0975      | 84.1        | 3     | 380     | 21    | POSITIVE |
| Glutathione, Reduced (GSH)                | FALSE | 308.0911      | 179         | 3     | 380     | 9     | POSITIVE |
| Glycerol 3-phosphate                      | FALSE | 173.02        | 132         | 3     | 380     | 5     | POSITIVE |
| Glycine                                   | FALSE | 76.0393       | 30          | 3     | 380     | 9     | POSITIVE |
| Gly-Gly                                   | FALSE | 133.0608      | 30          | 3     | 380     | 20    | POSITIVE |
| Gly-Leu                                   | FALSE | 189.1234      | 130         | 3     | 380     | 10    | POSITIVE |
| GMP                                       | FALSE | 364           | 152         | 3     | 380     | 12    | POSITIVE |
| GMP                                       | FALSE | 364.0653      | 152         | 3     | 380     | 13    | POSITIVE |
| Guanidine acetic acid                     | FALSE | 118.0611      | 43.1        | 3     | 380     | 40    | POSITIVE |
| Guanosine                                 | FALSE | 284.0989      | 152         | 3     | 380     | 9     | POSITIVE |
| Heptanoyl Carnitine                       | FALSE | 260.2         | 201.2       | 3     | 380     | 9     | POSITIVE |
| Histamine                                 | FALSE | 112.0869      | 95.1        | 3     | 380     | 13    | POSITIVE |
| Histidine                                 | FALSE | 156.0768      | 110.1       | 3     | 380     | 9     | POSITIVE |
| Homoserine                                | FALSE | 120.0655      | 74.1        | 3     | 380     | 9     | POSITIVE |
| Hydroxyglutaric acid                      | FALSE | 132           | 45          | 3     | 380     | 30    | POSITIVE |
| Hypoxanthine                              | FALSE | 137           | 119         | 3     | 380     | 21    | POSITIVE |
| Isoleucine                                | FALSE | 132.1019      | 86.1        | 3     | 380     | 9     | POSITIVE |
| Isovaleryl Carnitine                      | FALSE | 246.2         | 85          | 3     | 380     | 17    | POSITIVE |
| Kynurenic acid                            | FALSE | 190.0499      | 144.1       | 3     | 380     | 16    | POSITIVE |
| Kynurenine                                | FALSE | 209.0921      | 192         | 3     | 380     | 5     | POSITIVE |
| Lactic acid                               | FALSE | 91.04         | 73          | 3     | 380     | 15    | POSITIVE |
| L-anthranilic acid                        | FALSE | 139           | 121         | 3     | 380     | 12    | POSITIVE |
| L-Arginine                                | FALSE | 177.1         | 159.1       | 3     | 380     | 10    | POSITIVE |
| L-Thymine                                 | FALSE | 131.1         | 113.9       | 3     | 380     | 15    | POSITIVE |
| Lysine                                    | FALSE | 147.1128      | 130.2       | 3     | 380     | 5     | POSITIVE |
| Methyl Nicotinamide                       | FALSE | 138.08        | 95.1        | 3     | 380     | 25    | POSITIVE |
| Methylglutaric acid                       | FALSE | 147.0652      | 55.05423    | 3     | 380     | 10    | POSITIVE |
| Myo-Inositol                              | FALSE | 181.07        | 139.9       | 3     | 380     | 5     | POSITIVE |
| Myristoleic acid                          | FALSE | 227.2006      | 43.1        | 3     | 380     | 25    | POSITIVE |
| N, N Dimethyl Glycine                     | FALSE | 104.0706      | 44          | 3     | 380     | 48    | POSITIVE |
| N, N Dimethyl Glycine/Methyl alanine      | FALSE | 104.0706      | 58.1        | 3     | 380     | 12    | POSITIVE |
| N, N Dimethyl Glycine/Methyl alanine      | FALSE | 104.0706      | 58.1        | 3     | 380     | 12    | POSITIVE |
| N, N Dimethyl Glycine/Methyl alanine      | FALSE | 104.0706      | 58.1        | 3     | 380     | 9     | POSITIVE |
| NAAG                                      | FALSE | 305.0979      | 84.1        | 3     | 380     | 41    | POSITIVE |
| N-acetyl Glucosamine 6 Phos               | FALSE | 302.0635      | 284.1       | 3     | 380     | 5     | POSITIVE |
| N-Acetyl Lysine                           | FALSE | 189.1234      | 84.1        | 3     | 380     | 24    | POSITIVE |
| N-acetylalanine                           | FALSE | 132.0655      | 44.1        | 3     | 380     | 20    | POSITIVE |
| N-acetyl-glutamine                        | FALSE | 189.087       | 130         | 3     | 380     | 17    | POSITIVE |
| N-Acetylornithine                         | FALSE | 175.1077      | 70.1        | 3     | 380     | 29    | POSITIVE |
| N-Acetylputrescine                        | FALSE | 131.1179      | 114         | 3     | 380     | 12    | POSITIVE |
| NAD                                       | FALSE | 664.1164      | 136.06      | 3     | 380     | 60    | POSITIVE |
| N-carbamoyl-L-aspartate                   | FALSE | 177.0506      | 74          | 3     | 380     | 19    | POSITIVE |
| Nicotinamide                              | FALSE | 123.0553      | 80.1        | 3     | 380     | 20    | POSITIVE |
| Nicotinamide ribotide                     | FALSE | 335           | 123         | 3     | 380     | 30    | POSITIVE |
| Octonyl Carnitine                         | FALSE | 288.2         | 85          | 3     | 380     | 21    | POSITIVE |
| Oleic acid                                | FALSE | 283.27        | 89.2        | 3     | 380     | 13    | POSITIVE |
| Palmitic acid                             | FALSE | 257           | 57          | 3     | 380     | 40    | POSITIVE |
| Phenyl alanine                            | FALSE | 166.0963      | 120.1       | 3     | 380     | 13    | POSITIVE |
| Phospho Choline                           | FALSE | 185.0811      | 99          | 3     | 380     | 37    | POSITIVE |
| Proline                                   | FALSE | 116.0706      | 70.1        | 3     | 380     | 17    | POSITIVE |
| Putrescine                                | FALSE | 89.1073       | 72.1        | 3     | 380     | 8     | POSITIVE |
| Quinic acid                               | FALSE | 193.0707      | 111.04      | 3     | 380     | 10    | POSITIVE |
| SAH                                       | FALSE | 385.1289      | 136.1       | 3     | 380     | 33    | POSITIVE |
| Sarcosine/Alanine                         | FALSE | 90.055        | 44.1        | 3     | 380     | 20    | POSITIVE |
| Sarcosine/Alanine                         | FALSE | 90.055        | 72.1        | 3     | 380     | 9     | POSITIVE |
| Serine                                    | FALSE | 106.0499      | 60.1        | 3     | 380     | 9     | POSITIVE |
| Spermidine                                | FALSE | 146.1652      | 72.1        | 3     | 380     | 17    | POSITIVE |
| thiamine                                  | FALSE | 266.1196      | 122         | 3     | 380     | 19    | POSITIVE |
| Thymine-d4                                | FALSE | 131           | 113.9       | 3     | 380     | 16    | POSITIVE |
| Tyrosine                                  | FALSE | 182.0812      | 136.1       | 3     | 380     | 9     | POSITIVE |
| Uracil                                    | FALSE | 113           | 72          | 3     | 380     | 4     | POSITIVE |
| Urea                                      | FALSE | 61.0396       | 44          | 3     | 380     | 10    | POSITIVE |
| Valine                                    | FALSE | 118.0863      | 72.2        | 3     | 380     | 9     | POSITIVE |
| Xanthine                                  | FALSE | 153.04        | 110         | 3     | 380     | 21    | POSITIVE |
| xanthosine-5-phosphate                    | FALSE | 365.0493      | 97          | 3     | 380     | 13    | POSITIVE |

**Table S5.** 49 Detected metabolites and Multiple reaction monitoring (MRM) method of Yeast samples analysed in negative ionization mode.

| Compound Name                    | ISD   | Precursor ion | Product ion | Dwell | Frag(V) | CE(V) | Polarity |
|----------------------------------|-------|---------------|-------------|-------|---------|-------|----------|
| 1,3-diphosphateglycerate         | FALSE | 265           | 79          | 3     | 380     | 37    | NEGATIVE |
| 2,3-dihydroxybenzoic acid        | FALSE | 153           | 109         | 3     | 380     | 19    | NEGATIVE |
| 3-phosphoglycerate               | FALSE | 185           | 97          | 3     | 380     | 17    | NEGATIVE |
| 6-phospho-D-gluconate            | FALSE | 275           | 97          | 3     | 380     | 13    | NEGATIVE |
| allantoin                        | FALSE | 157.05        | 114         | 3     | 380     | 17    | NEGATIVE |
| anthranilate                     | FALSE | 136           | 92          | 3     | 380     | 18    | NEGATIVE |
| dihydroorotate                   | FALSE | 157           | 113         | 3     | 380     | 14    | NEGATIVE |
| D-sedoheptulose-1-7-phosphate    | FALSE | 289           | 97          | 3     | 380     | 27    | NEGATIVE |
| Eicasatetraenoic acid-D8 (ETA)   | FALSE | 311.5         | 59.05       | 3     | 380     | 35    | NEGATIVE |
| Farnesyl-PP                      | FALSE | 381           | 78.7        | 3     | 380     | 40    | NEGATIVE |
| FBP/GBP                          | FALSE | 338.9         | 79          | 3     | 380     | 60    | NEGATIVE |
| Fumarate                         | FALSE | 119           | 74          | 3     | 380     | 5     | NEGATIVE |
| Fumaric acid                     | FALSE | 115           | 71.1        | 3     | 380     | 5     | NEGATIVE |
| Glucose-6-Phosphate              | FALSE | 259           | 97          | 3     | 380     | 5     | NEGATIVE |
| Glutamic acid D5                 | FALSE | 151           | 107         | 3     | 380     | 13    | NEGATIVE |
| Glutamic acid-D5                 | FALSE | 151           | 107         | 3     | 380     | 5     | NEGATIVE |
| Glutamine                        | FALSE | 145           | 109         | 3     | 380     | 9     | NEGATIVE |
| HBA                              | FALSE | 103           | 59.1        | 3     | 380     | 5     | NEGATIVE |
| hexose-phosphate                 | FALSE | 259           | 79          | 3     | 380     | 42    | NEGATIVE |
| Hydroxyisocaproic acid           | FALSE | 131.006       | 85.1        | 3     | 380     | 16    | NEGATIVE |
| inosine                          | FALSE | 267           | 135         | 3     | 380     | 27    | NEGATIVE |
| Ketoglutarate                    | FALSE | 145           | 101.1       | 3     | 380     | 5     | NEGATIVE |
| lactate                          | FALSE | 89            | 43.2        | 3     | 380     | 16    | NEGATIVE |
| L-Anthranilic acid               | FALSE | 137           | 93.1        | 3     | 380     | 15    | NEGATIVE |
| L-Glutamic acid D5               | FALSE | 151           | 107         | 3     | 380     | 13    | NEGATIVE |
| L-Tryptophan                     | TRUE  | 205           | 117         | 3     | 380     | 10    | NEGATIVE |
| Malic acid                       | FALSE | 133           | 115.1       | 3     | 380     | 5     | NEGATIVE |
| Malonate (Propanedioate)         | FALSE | 103.1         | 59.1        | 3     | 380     | 5     | NEGATIVE |
| Maltose                          | FALSE | 341.1         | 161         | 3     | 380     | 5     | NEGATIVE |
| MALTOTETRAOSE                    | FALSE | 665.2         | 161.1       | 3     | 380     | 13    | NEGATIVE |
| N-acety AA-d3                    | FALSE | 177           | 90.8        | 3     | 380     | 6     | NEGATIVE |
| N-Aetyl Aspartic acid            | FALSE | 174           | 88.1        | 3     | 380     | 13    | NEGATIVE |
| octulose-monophosphate (O8P-O1P) | FALSE | 319           | 97          | 3     | 380     | 22    | NEGATIVE |
| p-aminobenzoate                  | FALSE | 136.05        | 92          | 3     | 380     | 18    | NEGATIVE |
| PEP                              | FALSE | 167           | 79          | 3     | 380     | 9     | NEGATIVE |
| Ribose-5-phosphate               | FALSE | 229.01        | 96.97       | 3     | 380     | 15    | NEGATIVE |
| shikimate                        | FALSE | 173           | 93          | 3     | 380     | 20    | NEGATIVE |
| sn-glycerol-3-phosphate          | FALSE | 171           | 79          | 3     | 380     | 15    | NEGATIVE |
| succinate                        | FALSE | 117           | 73          | 3     | 380     | 12    | NEGATIVE |
| taurine                          | FALSE | 124           | 80          | 3     | 380     | 18    | NEGATIVE |
| Tetradecanoic acid-D3 (TDA-D3)   | FALSE | 230.3         | 59          | 3     | 380     | 40    | NEGATIVE |
| trehalose-6-Phosphate            | FALSE | 421           | 79          | 3     | 380     | 36    | NEGATIVE |
| UDP-D-glucose                    | FALSE | 565           | 323         | 3     | 380     | 25    | NEGATIVE |
| UDP-N-acetyl-glucosamine         | FALSE | 606           | 385         | 3     | 380     | 28    | NEGATIVE |
| Uric acid                        | FALSE | 167.001       | 124         | 3     | 380     | 17    | NEGATIVE |
| ADP                              | FALSE | 426.1         | 159         | 3     | 380     | 27    | NEGATIVE |
| dGDP                             | FALSE | 426.12        | 159         | 3     | 380     | 27    | NEGATIVE |
| Fructose-6-Phosphate             | FALSE | 259           | 79.1        | 3     | 380     | 37    | NEGATIVE |
| NAD+                             | FALSE | 662           | 540         | 3     | 380     | 21    | NEGATIVE |

**Table S6.** LC-MS system run parameters.

| Source Parameters        |                                                                                                                                                                                                                                                                 |                                                                                                                                                           |                                        |
|--------------------------|-----------------------------------------------------------------------------------------------------------------------------------------------------------------------------------------------------------------------------------------------------------------|-----------------------------------------------------------------------------------------------------------------------------------------------------------|----------------------------------------|
| Parameter                | Value (+)                                                                                                                                                                                                                                                       | Value (-)                                                                                                                                                 |                                        |
| Gas Temp (°C)            | 250                                                                                                                                                                                                                                                             | 250                                                                                                                                                       |                                        |
| Gas Flow (l/min)         | 14                                                                                                                                                                                                                                                              | 14                                                                                                                                                        |                                        |
| Nebulizer (psi)          | 20                                                                                                                                                                                                                                                              | 20                                                                                                                                                        |                                        |
| SheathGasHeater          | 350                                                                                                                                                                                                                                                             | 350                                                                                                                                                       |                                        |
| SheathGasFlow            | 12                                                                                                                                                                                                                                                              | 12                                                                                                                                                        |                                        |
| Capillary (V)            | 3000                                                                                                                                                                                                                                                            | 3000                                                                                                                                                      |                                        |
| VCharging                | 1000                                                                                                                                                                                                                                                            | 1000                                                                                                                                                      |                                        |
| Ion Funnel Parameters    |                                                                                                                                                                                                                                                                 |                                                                                                                                                           |                                        |
| Pos High Pressure RF     | 150                                                                                                                                                                                                                                                             |                                                                                                                                                           |                                        |
| Pos Low Pressure RF      | 60                                                                                                                                                                                                                                                              |                                                                                                                                                           |                                        |
| Neg High Pressure RF     | 150                                                                                                                                                                                                                                                             |                                                                                                                                                           |                                        |
| Neg Low Pressure RF      | 60                                                                                                                                                                                                                                                              |                                                                                                                                                           |                                        |
| Auxiliary                |                                                                                                                                                                                                                                                                 |                                                                                                                                                           |                                        |
| Draw Speed               | 100.0 µL/min                                                                                                                                                                                                                                                    |                                                                                                                                                           |                                        |
| Eject Speed              | 100.0 µL/min                                                                                                                                                                                                                                                    |                                                                                                                                                           |                                        |
| Draw Position Offset     | 0.0 mm                                                                                                                                                                                                                                                          |                                                                                                                                                           |                                        |
| Wait Time After Drawing  | 2.0 s                                                                                                                                                                                                                                                           |                                                                                                                                                           |                                        |
| Vial/Well bottom sensing | Yes                                                                                                                                                                                                                                                             |                                                                                                                                                           |                                        |
| Injection                |                                                                                                                                                                                                                                                                 |                                                                                                                                                           |                                        |
| Injection Mode           | Injection with needle wash                                                                                                                                                                                                                                      |                                                                                                                                                           |                                        |
| Injection Volume         | 2.00 µL                                                                                                                                                                                                                                                         |                                                                                                                                                           |                                        |
| Needle Wash              |                                                                                                                                                                                                                                                                 |                                                                                                                                                           |                                        |
| Needle Wash Location     | Flush Port                                                                                                                                                                                                                                                      |                                                                                                                                                           |                                        |
| Wash Time                | 10.0 s                                                                                                                                                                                                                                                          |                                                                                                                                                           |                                        |
| Flow                     | 0.300 mL/min                                                                                                                                                                                                                                                    |                                                                                                                                                           |                                        |
| Use Solvent Types        | Yes                                                                                                                                                                                                                                                             |                                                                                                                                                           |                                        |
| Stroke Mode              | Synchronized                                                                                                                                                                                                                                                    |                                                                                                                                                           |                                        |
| Low Pressure Limit       | 0.00 bar                                                                                                                                                                                                                                                        |                                                                                                                                                           |                                        |
| High Pressure Limit      | 600.00 bar                                                                                                                                                                                                                                                      |                                                                                                                                                           |                                        |
| Max. Flow Ramp Up        | 100.000 mL/min <sup>2</sup>                                                                                                                                                                                                                                     |                                                                                                                                                           |                                        |
| Max. Flow Ramp Down      | 100.000 mL/min <sup>2</sup>                                                                                                                                                                                                                                     |                                                                                                                                                           |                                        |
| Expected Mixer           | No check                                                                                                                                                                                                                                                        |                                                                                                                                                           |                                        |
| Stop Time                |                                                                                                                                                                                                                                                                 |                                                                                                                                                           |                                        |
| Stoptime Mode            | Time set                                                                                                                                                                                                                                                        |                                                                                                                                                           |                                        |
| Stoptime                 | 23.00 min                                                                                                                                                                                                                                                       |                                                                                                                                                           |                                        |
| Post time mode           | Time set                                                                                                                                                                                                                                                        |                                                                                                                                                           |                                        |
| Post time                | 5.00min                                                                                                                                                                                                                                                         |                                                                                                                                                           |                                        |
| Column Mode              |                                                                                                                                                                                                                                                                 |                                                                                                                                                           |                                        |
|                          | Solvent A                                                                                                                                                                                                                                                       | Solvent B                                                                                                                                                 |                                        |
| Water's Positive Mode    | Grade water (Water, Optima™ LC/MS Grade, Cat. No. W6500, Fisher Chemical™, Fair Lawn, NJ, USA) + 0.1% formic acid (FA) (Formic Acid, 99.0 + %, Optima LC/MS grade, Cat. No. A117-50, Fisher Chemical, Fisher Scientific, Fair Lawn, NJ, USA)                    | 100% Acetonitrile (ACN) (Acetonitrile, Optima LC/MS grade, Cat. No. A955, Fisher Chemical, Fisher Scientific, Fair Lawn, NJ, USA) + 0.1% formic acid (FA) |                                        |
| Water's Negative Mode    | 95% Grade water (Water, Optima™ LC/MS Grade, Cat. No. W6500, Fisher Chemical™, Fair Lawn, NJ, USA) + 5% Acetonitrile + 20 mM Ammonium acetate (Ammonium Acetate (Optima LC/MS), Cat. No. A11450 Fisher Chemical, Fisher Scientific, Fair Lawn, NJ, USA), pH 9.0 | 100% Acetonitrile (ACN) (Acetonitrile, Optima LC/MS grade, Cat. No. A955, Fisher Chemical, Fisher Scientific, Fair Lawn, NJ, USA)                         |                                        |
| Timetable                |                                                                                                                                                                                                                                                                 |                                                                                                                                                           |                                        |
| Time                     | Function                                                                                                                                                                                                                                                        | Parameter                                                                                                                                                 | Solvent composition                    |
| 1                        | 3.00 min                                                                                                                                                                                                                                                        | Change Solvent Composition                                                                                                                                | Solvent Composition A:70.00% B:30.00 % |
| 2                        | 3.00 min                                                                                                                                                                                                                                                        | Change Flow                                                                                                                                               | Flow: 0.3 mL/min                       |
| 3                        | 12.00 min                                                                                                                                                                                                                                                       | Change Solvent Composition                                                                                                                                | Solvent Composition A:98.00% B:2.00 %  |
| 4                        | 12.00 min                                                                                                                                                                                                                                                       | Change Flow                                                                                                                                               | Flow: 0.3 mL/min                       |
| 5                        | 15.00 min                                                                                                                                                                                                                                                       | Change Solvent Composition                                                                                                                                | Solvent Composition A:98.00% B:2.00 %  |
| 6                        | 15.00 min                                                                                                                                                                                                                                                       | Change Flow                                                                                                                                               | Flow: 0.3 mL/min                       |
| 7                        | 16.00 min                                                                                                                                                                                                                                                       | Change Solvent Composition                                                                                                                                | Solvent Composition A:15.00% B:85.00 % |
| 8                        | 16.00 min                                                                                                                                                                                                                                                       | Change Flow                                                                                                                                               | Flow: 0.3 mL/min                       |
| 9                        | 23.00 min                                                                                                                                                                                                                                                       | Change Solvent Composition                                                                                                                                | Solvent Composition A:15.00% B:85.00 % |
| 10                       | 23.00 min                                                                                                                                                                                                                                                       | Change Flow                                                                                                                                               | Flow: 0.3 mL/min                       |
